# Supplementary material for: Identification of Neoantigens and Construction of Immune Subtypes in Prostate Adenocarcinoma
Source: Front Genet. 2022 Apr 25;13:886983. doi: 10.3389/fgene.2022.886983 (PMC9081437; doi:10.3389/fgene.2022.886983)
Supplement: Supplementary file 4 [file Table1.XLSX]

## Sheet: Sheet1
Gene	Gistic(Q-value)	Cytoband	CNA	Profiled Samples	#	Freq	Is Cancer Gene (source: OncoKB)
ZDHHC9		Xq26.1	AMP	1	489	0.002	No
IGBP1P1		14q13.2	AMP	4	489	0.008	No
KCTD10		12q24.11	AMP	5	489	0.01	No
PALM2AKAP2		9q31.3	AMP	5	489	0.01	No
C20ORF27		20p13	AMP	1	489	0.002	No
TMEM38A		19p13.11	AMP	3	489	0.006	No
ERMN		2q24.1	AMP	2	489	0.004	No
SEMA6D		15q21.1	AMP	1	489	0.002	No
OXR1		8q23.1	AMP	41	489	0.084	No
ZNF883		9q32	AMP	5	489	0.01	No
AQP6		12q13.12	AMP	1	489	0.002	No
ZNF862		7q36.1	AMP	5	489	0.01	No
GIMAP2		7q36.1	AMP	5	489	0.01	No
B3GALT6		1p36.33	AMP	2	489	0.004	No
CRLF3		17q11.2	AMP	1	489	0.002	No
BROX		1q41	AMP	1	489	0.002	No
SNX25		4q35.1	AMP	1	489	0.002	No
TMEM120B		12q24.31	AMP	4	489	0.008	No
TP53TG3HP		16p11.1	AMP	9	489	0.018	No
TSEN34		19q13.42	AMP	3	489	0.006	No
MTERF2		12q23.3	AMP	7	489	0.014	No
LRRC37A4P		17q21.31	AMP	2	489	0.004	No
CNOT6		5q35.3	AMP	4	489	0.008	No
AQP7		9p13.3	AMP	3	489	0.006	No
ANKRD20A19P		13q12.12	AMP	2	489	0.004	No
SRARP		1p36.13	AMP	1	489	0.002	No
FOXR1		11q23.3	AMP	3	489	0.006	No
MRPS2		9q34.3	AMP	5	489	0.01	No
RSL1D1		16p13.13	AMP	5	489	0.01	No
SPATA9		5q15	AMP	1	489	0.002	No
AQP9		15q21.3	AMP	1	489	0.002	No
SYNC		1p35.1	AMP	4	489	0.008	No
THG1L		5q33.3	AMP	3	489	0.006	No
ZNF512B		20q13.33	AMP	5	489	0.01	No
KRTAP25-1		21q22.11	AMP	1	489	0.002	No
RNF31		14q12	AMP	1	489	0.002	No
TRIM64B		11q14.3	AMP	2	489	0.004	No
FAM200B		4p15.32	AMP	2	489	0.004	No
RMDN1		8q21.3	AMP	37	489	0.076	No
AR		Xq12	AMP	5	489	0.01	Yes
CFHR5		1q31.3	AMP	1	489	0.002	No
NOC2L		1p36.33	AMP	2	489	0.004	No
LINC01372		7q11.21	AMP	1	489	0.002	No
CPNE8		12q12	AMP	3	489	0.006	No
ZNF490		19p13.2-p13.13	AMP	1	489	0.002	No
INTS11		1p36.33	AMP	2	489	0.004	No
ADA		20q13.12	AMP	3	489	0.006	No
C9ORF40		9q21.13	AMP	1	489	0.002	No
KRTAP3-1		17q21.2	AMP	1	489	0.002	No
ABCC6		16p13.11	AMP	6	489	0.012	No
SSX8P		Xp11.22	AMP	1	489	0.002	No
LINC01954		2p25.1	AMP	4	489	0.008	No
ADAM10		15q21.3	AMP	1	489	0.002	No
CNGB3		8q21.3	AMP	36	489	0.074	No
ANP32A-IT1		15q23	AMP	2	489	0.004	No
NKPD1		19q13.32	AMP	1	489	0.002	No
ADAM8		10q26.3	AMP	1	489	0.002	No
CERNA1		15q21.2	AMP	2	489	0.004	No
KRTAP1-5		17q21.2	AMP	1	489	0.002	No
ARAF		Xp11.3	AMP	2	489	0.004	Yes
ADAR		1q21.3	AMP	11	489	0.022	No
WDR45B		17q25.3	AMP	3	489	0.006	No
PPP1R37		19q13.32	AMP	2	489	0.004	No
COQ4		9q34.11	AMP	7	489	0.014	No
PAN3-AS1		13q12.2	AMP	3	489	0.006	No
APOBR		16p12.1	AMP	4	489	0.008	No
NUPR2		7p11.2	AMP	1	489	0.002	No
TADA3		3p25.3	AMP	1	489	0.002	No
LINC01135		1p32.1	AMP	1	489	0.002	No
HAPLN3		15q26.1	AMP	1	489	0.002	No
TRPM3		9q21.12-q21.13	AMP	2	489	0.004	No
SSX6P		Xp11.23	AMP	2	489	0.004	No
CCM2L		20q11.21	AMP	4	489	0.008	No
ADARB1		21q22.3	AMP	1	489	0.002	No
CD99P1		Xp22.33 and Yp11.31	AMP	3	489	0.006	No
NEBL-AS1		10p12.31	AMP	1	489	0.002	No
TMEM45A		3q12.2	AMP	3	489	0.006	No
KCTD15		19q13.11	AMP	2	489	0.004	No
LINC01189		9q13	AMP	6	489	0.012	No
SLC35F6		2p23.3	AMP	2	489	0.004	No
CUTALP		9q33.2	AMP	5	489	0.01	No
SPATA16		3q26.31	AMP	11	489	0.022	No
RTP2		3q27.3	AMP	6	489	0.012	No
SSX7		Xp11.22	AMP	1	489	0.002	No
BRI3BP		12q24.31	AMP	3	489	0.006	No
ADARB2		10p15.3	AMP	2	489	0.004	No
SBDS		7q11.21	AMP	2	489	0.004	Yes
PHGR1		15q15.1	AMP	1	489	0.002	No
SECISBP2		9q22.2	AMP	1	489	0.002	No
UACA		15q23	AMP	3	489	0.006	No
LRRC47		1p36.32	AMP	3	489	0.006	No
ATP2A1-AS1		16p11.2	AMP	4	489	0.008	No
ZBTB18		1q44	AMP	3	489	0.006	No
C12ORF56		12q14.2	AMP	3	489	0.006	No
CCDC153		11q23.3	AMP	3	489	0.006	No
OR4C16		11q11	AMP	1	489	0.002	No
SAMD10		20q13.33	AMP	5	489	0.01	No
DDX39A		19p13.12	AMP	2	489	0.004	No
KNTC1		12q24.31	AMP	5	489	0.01	No
ATP5MK		10q24.33	AMP	2	489	0.004	No
POMP		13q12.3	AMP	3	489	0.006	No
LRTM2		12p13.33	AMP	2	489	0.004	No
INSL3		19p13.11	AMP	2	489	0.004	No
FAM106A		17p11.2	AMP	4	489	0.008	No
BCAS1		20q13.2	AMP	6	489	0.012	No
SLC9A6		Xq26.3	AMP	1	489	0.002	No
OR4C11		11q11	AMP	1	489	0.002	No
PSMD14		2q24.2	AMP	1	489	0.002	No
ABHD16B		20q13.33	AMP	5	489	0.01	No
KRTAP9-2		17q21.2	AMP	1	489	0.002	No
HDAC9		7p21.1	AMP	8	489	0.016	No
LOXHD1		18q21.1	AMP	1	489	0.002	No
ABCC2		10q24.2	AMP	4	489	0.008	No
CAMK1		3p25.3	AMP	1	489	0.002	No
ATP5PD		17q25.1	AMP	3	489	0.006	No
ATRAID		2p23.3	AMP	2	489	0.004	No
LINC01555		1p22.3	AMP	1	489	0.002	No
ADCY2		5p15.31	AMP	1	489	0.002	No
LTB4R		14q12	AMP	1	489	0.002	No
MRPS17		7p11.2	AMP	1	489	0.002	No
FLOT1		6p21.33	AMP	1	489	0.002	No
UBE2E3		2q31.3	AMP	1	489	0.002	No
USP34		2p15	AMP	1	489	0.002	No
ADCY3		2p23.3	AMP	1	489	0.002	No
KRTAP3-2		17q21.2	AMP	1	489	0.002	No
ABHD14B		3p21.2	AMP	1	489	0.002	No
TOPORS		9p21.1	AMP	2	489	0.004	No
TMA7		3p21.31	AMP	1	489	0.002	No
BARX2		11q24.3	AMP	3	489	0.006	No
TRABD2A		2p11.2	AMP	4	489	0.008	No
ATP6V1FNB		7q32.1	AMP	3	489	0.006	No
PRG4		1q31.1	AMP	1	489	0.002	No
LACTB2		8q13.3	AMP	34	489	0.07	No
C11ORF68		11q13.1	AMP	7	489	0.014	No
SETD1A		16p11.2	AMP	4	489	0.008	Yes
TMEM132A		11q12.2	AMP	1	489	0.002	No
DET1		15q26.1	AMP	1	489	0.002	No
TMEM201		1p36.22	AMP	1	489	0.002	No
ZNF461		19q13.13	AMP	2	489	0.004	No
NKX6-3		8p11.21	AMP	8	489	0.016	No
CCP110		16p12.3	AMP	5	489	0.01	No
PTOV1-AS1		19q13.33	AMP	1	489	0.002	No
ID2-AS1		2p25.1	AMP	4	489	0.008	No
BANP		16q24.2	AMP	1	489	0.002	No
VWA5B1		1p36.12	AMP	1	489	0.002	No
CMKLR1		12q23.3	AMP	5	489	0.01	No
ANGPT4		20p13	AMP	1	489	0.002	No
C19ORF12		19q12	AMP	2	489	0.004	No
SSX3		Xp11.23	AMP	3	489	0.006	No
TRAPPC12		2p25.3	AMP	4	489	0.008	No
ZNF251		8q24.3	AMP	31	489	0.063	No
UCHL5		1q31.2	AMP	2	489	0.004	No
ZNF585B		19q13.12	AMP	2	489	0.004	No
OLIG2		21q22.11	AMP	1	489	0.002	Yes
LINC01020		5p15.32	AMP	2	489	0.004	No
CKMT2-AS1		5q14.1	AMP	1	489	0.002	No
KMT5B		11q13.2	AMP	10	489	0.02	No
CEMP1		16p13.3	AMP	6	489	0.012	No
ANKRD36BP1		1q24.2	AMP	2	489	0.004	No
LINC00989		4q21.21	AMP	4	489	0.008	No
UBXN10		1p36.12	AMP	1	489	0.002	No
LINC02171		4p16.3	AMP	2	489	0.004	No
LINC00661		19p13.12	AMP	3	489	0.006	No
INPPL1		11q13.4	AMP	1	489	0.002	Yes
DGCR2		22q11.21	AMP	1	489	0.002	No
SECTM1		17q25.3	AMP	3	489	0.006	No
RPL8		8q24.3	AMP	31	489	0.063	No
LINC00167		11q24.3	AMP	4	489	0.008	No
USPL1		13q12.3	AMP	2	489	0.004	No
ZBTB25		14q23.3	AMP	2	489	0.004	No
LINC01505		9q31.2	AMP	6	489	0.012	No
ZNF445		3p21.31	AMP	1	489	0.002	No
TRAPPC2		Xp22.2	AMP	4	489	0.008	No
INPP5D		2q37.1	AMP	1	489	0.002	Yes
RPL9		4p14	AMP	1	489	0.002	No
MEF2B		19p13.11	AMP	1	489	0.002	Yes
HCG23		6p21.32	AMP	1	489	0.002	No
EIF1		17q21.2	AMP	1	489	0.002	No
PAQR7		1p36.11	AMP	1	489	0.002	No
ZNF45		19q13.31	AMP	1	489	0.002	No
NME4		16p13.3	AMP	5	489	0.01	No
SPDYE3		7q22.1	AMP	8	489	0.016	No
TRIM13		13q14.2	AMP	1	489	0.002	No
PLD5		1q43	AMP	3	489	0.006	No
RPL10		Xq28	AMP	1	489	0.002	Yes
UBE2L3		22q11.21	AMP	1	489	0.002	No
MAPK1IP1L		14q22.3	AMP	2	489	0.004	No
NME3		16p13.3	AMP	7	489	0.014	No
LGALS7B		19q13.2	AMP	3	489	0.006	No
C5ORF52		5q33.3	AMP	3	489	0.006	No
THAP7-AS1		22q11.21	AMP	1	489	0.002	No
VWA8-AS1		13q14.11	AMP	1	489	0.002	No
AFF3		2q11.2	AMP	2	489	0.004	Yes
RPL11		1p36.11	AMP	1	489	0.002	No
ACKR2		3p22.1	AMP	2	489	0.004	No
NME2		17q21.33	AMP	5	489	0.01	No
IQSEC3		12p13.33	AMP	1	489	0.002	No
CST7		20p11.21	AMP	1	489	0.002	No
SCEL		13q22.3	AMP	3	489	0.006	No
LCA5		6q14.1	AMP	1	489	0.002	No
LINC01096		4p15.33	AMP	1	489	0.002	No
RPL12		9q33.3	AMP	8	489	0.016	No
CCR6		6q27	AMP	1	489	0.002	No
NME1		17q21.33	AMP	5	489	0.01	No
LAD1		1q32.1	AMP	1	489	0.002	No
ERVV-2		19q13.41	AMP	1	489	0.002	No
UBE2N		12q22	AMP	8	489	0.016	No
SCO2		22q13.33	AMP	2	489	0.004	No
CEP104		1p36.32	AMP	3	489	0.006	No
COPS3		17p11.2	AMP	2	489	0.004	No
PEX11B		1q21.1	AMP	5	489	0.01	No
RPL13		16q24.3	AMP	1	489	0.002	No
CCR7		17q21.2	AMP	1	489	0.002	No
L1CAM		Xq28	AMP	1	489	0.002	No
UBE2V1		20q13.13	AMP	6	489	0.012	No
CPZ		4p16.1	AMP	1	489	0.002	No
INPP4A		2q11.2	AMP	1	489	0.002	Yes
ZKSCAN5		7q22.1	AMP	6	489	0.012	No
DYRK4		12p13.32	AMP	1	489	0.002	No
CTNNB1		3p22.1	AMP	1	489	0.002	Yes
SART3		12q23.3	AMP	5	489	0.01	No
UBE2V2		8q11.21	AMP	21	489	0.043	No
KCNU1		8p11.23	AMP	13	489	0.027	No
CCR4		3p22.3	AMP	1	489	0.002	No
CBX4		17q25.3	AMP	1	489	0.002	No
SPDYE2		7q22.1	AMP	5	489	0.01	No
RPL17		18q21.1	AMP	1	489	0.002	No
DOCK4		7q31.1	AMP	4	489	0.008	No
ARMC3		10p12.2	AMP	2	489	0.004	No
UBE3A		15q11.2	AMP	7	489	0.014	No
KTN1		14q22.1	AMP	2	489	0.004	Yes
CSAD		12q13.13	AMP	6	489	0.012	No
CCR5		3p21.31	AMP	1	489	0.002	No
STON1-GTF2A1L		2p16.3	AMP	1	489	0.002	No
ATP6V0CP3		6p21.1	AMP	1	489	0.002	No
SPRYD7		13q14.2	AMP	1	489	0.002	No
CEMIP		15q25.1	AMP	1	489	0.002	No
PEX10		1p36.32	AMP	2	489	0.004	No
LANCL2		7p11.2	AMP	1	489	0.002	No
SDHC		1q23.3	AMP	4	489	0.008	Yes
THAP11		16q22.1	AMP	1	489	0.002	No
POTEB		15q11.2	AMP	5	489	0.01	No
PEX12		17q12	AMP	1	489	0.002	No
ERBIN		5q12.3	AMP	1	489	0.002	No
C2CD4D		1q21.3	AMP	8	489	0.016	No
ZNF815P		7p22.1	AMP	2	489	0.004	No
IFT172		2p23.3	AMP	2	489	0.004	No
NLRP3		1q44	AMP	2	489	0.004	No
SNORD114-24		14q32.31	AMP	3	489	0.006	No
SLC6A20		3p21.31	AMP	1	489	0.002	No
VANGL2		1q23.2	AMP	3	489	0.006	No
PEX13		2p15	AMP	1	489	0.002	No
POTEKP		2q21.1	AMP	1	489	0.002	No
GUCY2EP		11q13.5	AMP	3	489	0.006	No
LINC01097		4p15.33	AMP	1	489	0.002	No
LINC02418		12q24.33	AMP	2	489	0.004	No
FRAT2		10q24.1	AMP	3	489	0.006	No
BLNK		10q24.1	AMP	1	489	0.002	No
SNORD114-23		14q32.31	AMP	3	489	0.006	No
RBFOX1		16p13.3	AMP	5	489	0.01	No
ZNF891		12q24.33	AMP	2	489	0.004	No
FEZF2		3p14.2	AMP	2	489	0.004	No
TTC7A		2p21	AMP	1	489	0.002	No
PEX14		1p36.22	AMP	1	489	0.002	No
ALKBH2		12q24.11	AMP	5	489	0.01	No
ARRDC3-AS1		5q14.3	AMP	1	489	0.002	No
EXOSC2		9q34.12	AMP	4	489	0.008	No
LINC00842		10q11.22	AMP	2	489	0.004	No
GPR63		6q16.1	AMP	2	489	0.004	No
RGS22		8q22.2	AMP	42	489	0.086	No
GCA		2q24.2	AMP	2	489	0.004	No
PLEKHH1		14q24.1	AMP	2	489	0.004	No
ZNF283		19q13.31	AMP	1	489	0.002	No
MZF1		19q13.43	AMP	1	489	0.002	No
PF4		4q13.3	AMP	4	489	0.008	No
NODAL		10q22.1	AMP	4	489	0.008	No
SPATA31A7		9q12	AMP	6	489	0.012	No
RSPH6A		19q13.3	AMP	2	489	0.004	No
FBXO46		19q13.32	AMP	1	489	0.002	No
KRTAP1-4		17q21.2	AMP	1	489	0.002	No
KRT24		17q21.2	AMP	1	489	0.002	No
LMOD1		1q32.1	AMP	1	489	0.002	No
SLC45A4		8q24.3	AMP	31	489	0.063	No
GRAMD1B		11q24.1	AMP	1	489	0.002	No
LYPD5		19q13.31	AMP	1	489	0.002	No
GAB3		Xq28	AMP	1	489	0.002	No
PF4V1		4q13.3	AMP	3	489	0.006	No
ZNF41		Xp11.3	AMP	2	489	0.004	No
ARCN1		11q23.3	AMP	2	489	0.004	No
INSIG1		7q36.3	AMP	2	489	0.004	No
PTBP3		9q32	AMP	6	489	0.012	No
MTG2		20q13.33	AMP	4	489	0.008	No
BCL9L		11q23.3	AMP	3	489	0.006	Yes
HOXA11-AS		7p15.2	AMP	4	489	0.008	No
PTCHD4		6p12.3	AMP	1	489	0.002	No
SNORD114-22		14q32.31	AMP	3	489	0.006	No
SEC13		3p25.3	AMP	1	489	0.002	No
RPL7A		9q34.2	AMP	7	489	0.014	No
USP31		16p12.2	AMP	5	489	0.01	No
SHROOM4		Xp11.22	AMP	1	489	0.002	No
PFAS		17p13.1	AMP	1	489	0.002	No
TRIM23		5q12.3	AMP	1	489	0.002	No
NMT1		17q21.31	AMP	2	489	0.004	No
FOXN4		12q24.11	AMP	5	489	0.01	No
DICER1		14q32.13	AMP	2	489	0.004	Yes
SLC12A6		15q14	AMP	3	489	0.006	No
SEC14L1		17q25.2-q25.3	AMP	3	489	0.006	No
CYS1		2p25.1	AMP	4	489	0.008	No
TP73-AS1		1p36.32	AMP	3	489	0.006	No
PRR12		19q13.33	AMP	2	489	0.004	No
CFP		Xp11.23	AMP	2	489	0.004	No
AREG		4q13.3	AMP	3	489	0.006	No
NQO2		6p25.2	AMP	1	489	0.002	No
LINC00997		7p14.3	AMP	5	489	0.01	No
GPCPD1		20p12.3	AMP	3	489	0.006	No
BCLAF3		Xp22.12	AMP	3	489	0.006	No
TMOD4		1q21.3	AMP	8	489	0.016	No
SIRT5		6p23	AMP	1	489	0.002	No
TMEM179		14q32.33	AMP	2	489	0.004	No
BAMBI		10p12.1	AMP	1	489	0.002	No
C1ORF56		1q21.3	AMP	8	489	0.016	No
ALG8		11q14.1	AMP	3	489	0.006	No
EIF2AK1		7p22.1	AMP	2	489	0.004	No
WIPI1		17q24.2	AMP	2	489	0.004	No
VAX2		2p13.3	AMP	1	489	0.002	No
POP5		12q24.31	AMP	7	489	0.014	No
GARS1-DT		7p14.3	AMP	6	489	0.012	No
LRRC8A		9q34.11	AMP	7	489	0.014	No
ZC2HC1A		8q21.13	AMP	37	489	0.076	No
ARF3		12q13.12	AMP	1	489	0.002	No
TMOD3		15q21.2	AMP	2	489	0.004	No
TRPM8		2q37.1	AMP	1	489	0.002	No
UCKL1		20q13.33	AMP	5	489	0.01	No
CACYBP		1q25.1	AMP	2	489	0.004	No
SUSD4		1q41	AMP	1	489	0.002	No
PPM1H		12q14.1-q14.2	AMP	2	489	0.004	No
STPG3-AS1		9q34.3	AMP	7	489	0.014	No
LINC01126		2p21	AMP	1	489	0.002	No
ABHD17B		9q21.13	AMP	3	489	0.006	No
CCDC61		19q13.32	AMP	2	489	0.004	No
ARF4		3p14.3	AMP	1	489	0.002	No
TMOD2		15q21.2	AMP	2	489	0.004	No
LINGO3		19p13.3	AMP	1	489	0.002	No
SLC25A51P1		6q12	AMP	1	489	0.002	No
ISY1		3q21.3	AMP	8	489	0.016	No
ADCY5		3q21.1	AMP	2	489	0.004	No
NDUFAF1		15q15.1	AMP	1	489	0.002	No
ARL4D		17q21.31	AMP	2	489	0.004	No
PCDHB5		5q31.3	AMP	4	489	0.008	No
ADCY7		16q12.1	AMP	2	489	0.004	No
LSM4		19p13.11	AMP	2	489	0.004	No
SIRT4		12q24.31	AMP	6	489	0.012	No
MYORG		9p13.3	AMP	3	489	0.006	No
SSH3		11q13.2	AMP	10	489	0.02	No
ADCY6		12q13.12	AMP	1	489	0.002	No
PRRG4		11p13	AMP	1	489	0.002	No
REREP3		15q11.2	AMP	5	489	0.01	No
USP25		21q21.1	AMP	3	489	0.006	No
ADCY8		8q24.22	AMP	35	489	0.072	No
LINC01349		1p21.2	AMP	3	489	0.006	No
SELENOO		22q13.33	AMP	2	489	0.004	No
ZBTB11		3q12.3	AMP	2	489	0.004	No
ZNF302		19q13.11	AMP	2	489	0.004	No
ARRDC2		19p13.11	AMP	2	489	0.004	No
PDPR		16q22.1	AMP	2	489	0.004	No
PRRG3		Xq28	AMP	4	489	0.008	No
TMEM70		8q21.11	AMP	37	489	0.076	No
PHF20L1		8q24.22	AMP	34	489	0.07	No
PPM1L		3q25.33-q26.1	AMP	7	489	0.014	No
ZNF341-AS1		20q11.22	AMP	4	489	0.008	No
ADCY9		16p13.3	AMP	5	489	0.01	No
FAM107B		10p13	AMP	2	489	0.004	No
C16ORF86		16q22.1	AMP	1	489	0.002	No
LRRC37BP1		17q11.2	AMP	2	489	0.004	No
ASPSCR1		17q25.3	AMP	2	489	0.004	Yes
C4ORF45		4q32.1	AMP	1	489	0.002	No
NUTM1		15q14	AMP	3	489	0.006	Yes
CT55		Xq26.3	AMP	1	489	0.002	No
OR10H4		19p13.12	AMP	3	489	0.006	No
RHBDD3		22q12.2	AMP	1	489	0.002	No
MESP2		15q26.1	AMP	1	489	0.002	No
PPP1R3G		6p25.1	AMP	1	489	0.002	No
ADCYAP1		18p11.32	AMP	1	489	0.002	No
CLRN1-AS1		3q25.1	AMP	6	489	0.012	No
METTL9		16p12.2	AMP	5	489	0.01	No
GPR157		1p36.22	AMP	2	489	0.004	No
KHDRBS2		6q11.1	AMP	2	489	0.004	No
SPATA6L		9p24.2-p24.1	AMP	1	489	0.002	No
RRN3		16p13.11	AMP	6	489	0.012	No
CSTF3-DT		11p13	AMP	1	489	0.002	No
C8ORF44		8q13.1	AMP	31	489	0.063	No
ZNF674-AS1		Xp11.3	AMP	4	489	0.008	No
ADCYAP1R1		7p14.3	AMP	5	489	0.01	No
APH1A		1q21.2	AMP	8	489	0.016	Yes
SRRM2-AS1		16p13.3	AMP	6	489	0.012	No
PIGX		3q29	AMP	7	489	0.014	No
AMIGO3		3p21.31	AMP	1	489	0.002	No
LINC01806		2q24.2	AMP	2	489	0.004	No
ZCWPW1		7q22.1	AMP	8	489	0.016	No
TACC3		4p16.3	AMP	5	489	0.01	No
CNOT4		7q33	AMP	6	489	0.012	No
COG5		7q22.3	AMP	4	489	0.008	No
TMED11P		4p16.3	AMP	4	489	0.008	No
TCAF1		7q35	AMP	6	489	0.012	No
ADD1		4p16.3	AMP	1	489	0.002	No
IPP		1p34.1	AMP	1	489	0.002	No
GAGE2A		Xp11.23	AMP	1	489	0.002	No
LGR5		12q21.1	AMP	3	489	0.006	No
ZNHIT1		7q22.1	AMP	5	489	0.01	No
NME6		3p21.31	AMP	1	489	0.002	No
LINC01829		2p14	AMP	1	489	0.002	No
LINC00476		9q22.32	AMP	6	489	0.012	No
ADD2		2p13.3	AMP	1	489	0.002	No
LRRC72		7p21.1	AMP	6	489	0.012	No
PDX1		13q12.2	AMP	3	489	0.006	No
BLZF1		1q24.2	AMP	1	489	0.002	No
PRSS35		6q14.2	AMP	1	489	0.002	No
OR5D18		11q12.1	AMP	1	489	0.002	No
CDC40		6q21	AMP	1	489	0.002	No
PIBF1		13q21.33-q22.1	AMP	1	489	0.002	No
DMAC2L		14q21.3	AMP	3	489	0.006	No
LINC00525		7p12.3	AMP	2	489	0.004	No
SLC30A9		4p13	AMP	1	489	0.002	No
HOOK1		1p32.1	AMP	1	489	0.002	No
SLK		10q24.33-q25.1	AMP	2	489	0.004	No
CCDC3		10p13	AMP	1	489	0.002	No
MIR503HG		Xq26.3	AMP	1	489	0.002	No
C1ORF100		1q44	AMP	3	489	0.006	No
ANKRD26P1		16q11.2	AMP	10	489	0.02	No
MBTPS2		Xp22.12	AMP	2	489	0.004	No
NUTF2		16q22.1	AMP	1	489	0.002	No
OR5D14		11q11	AMP	1	489	0.002	No
BHLHA15		7q21.3	AMP	9	489	0.018	No
GAS5-AS1		1q25.1	AMP	2	489	0.004	No
GEMIN8		Xp22.2	AMP	3	489	0.006	No
MPZL2		11q23.3	AMP	2	489	0.004	No
OR5L1		11q12.1	AMP	1	489	0.002	No
FAM138B		2q14.1	AMP	1	489	0.002	No
SNHG16		17q25.1	AMP	2	489	0.004	No
CHST15		10q26.13	AMP	1	489	0.002	No
DNAAF3		19q13.42	AMP	2	489	0.004	No
NDUFA6-DT		22q13.2	AMP	1	489	0.002	No
ATP6AP1L		5q14.2	AMP	2	489	0.004	No
NOC4L		12q24.33	AMP	2	489	0.004	No
UBR5		8q22.3	AMP	39	489	0.08	Yes
FST		5q11.2	AMP	1	489	0.002	No
SOGA1		20q11.23	AMP	3	489	0.006	No
DHRS2		14q11.2	AMP	1	489	0.002	No
FAM167A		8p23.1	AMP	3	489	0.006	No
SH3GLB1		1p22.3	AMP	2	489	0.004	No
ANKRD30A		10p11.21	AMP	1	489	0.002	No
ANKLE1		19p13.11	AMP	2	489	0.004	No
MRPL45P2		17q21.32	AMP	3	489	0.006	No
CTAGE7P		10q26.3	AMP	1	489	0.002	No
PSMA8		18q11.2	AMP	1	489	0.002	No
TLDC2		20q11.23	AMP	3	489	0.006	No
H3-5		12p11.21	AMP	3	489	0.006	Yes
MAMDC2-AS1		9q21.12	AMP	2	489	0.004	No
PLA1A		3q13.33	AMP	1	489	0.002	No
LINC02894		8q22.1	AMP	38	489	0.078	No
SPATA31D5P		9q21.32	AMP	2	489	0.004	No
RPL21		13q12.2	AMP	2	489	0.004	No
UBP1		3p22.3	AMP	1	489	0.002	No
OR4C6		11q11	AMP	1	489	0.002	No
KLHL32		6q16.1	AMP	1	489	0.002	No
RNASEH1-AS1		2p25.3	AMP	4	489	0.008	No
PPFIA3		19q13.33	AMP	3	489	0.006	No
RGPD3		2q12.2	AMP	1	489	0.002	No
NOS3		7q36.1	AMP	5	489	0.01	No
FER1L6-AS1		8q24.13	AMP	37	489	0.076	No
A1BG		19q13.43	AMP	1	489	0.002	No
LINC01013		6q23.2	AMP	2	489	0.004	No
UNC5B		10q22.1	AMP	4	489	0.008	No
TUBGCP5		15q11.2	AMP	5	489	0.01	No
AGPS		2q31.2	AMP	1	489	0.002	No
ZNF530		19q13.43	AMP	2	489	0.004	No
RNF166		16q24.2-q24.3	AMP	1	489	0.002	No
BCL2L2-PABPN1		14q11.2	AMP	1	489	0.002	No
EIF3E		8q23.1	AMP	37	489	0.076	Yes
RPL22		1p36.31	AMP	1	489	0.002	Yes
LAPTM4A		2p24.1	AMP	1	489	0.002	No
SPAG17		1p12	AMP	2	489	0.004	No
LMO4		1p22.3	AMP	1	489	0.002	No
RPL23A		17q11.2	AMP	2	489	0.004	No
INSRR		1q23.1	AMP	4	489	0.008	No
UCHL1		4p13	AMP	2	489	0.004	No
OR4S2		11q11	AMP	1	489	0.002	No
ZNF670		1q44	AMP	2	489	0.004	No
FMNL2		2q23.3	AMP	2	489	0.004	No
XAGE1A		Xp11.22	AMP	1	489	0.002	No
NOS2		17q11.2	AMP	2	489	0.004	No
APOL1		22q12.3	AMP	2	489	0.004	No
AKR1B15		7q33	AMP	7	489	0.014	No
PVRIG2P		7q22.1	AMP	8	489	0.016	No
CEMIP2		9q21.13	AMP	2	489	0.004	No
IGFL4		19q13.32	AMP	2	489	0.004	No
NOS1		12q24.22	AMP	8	489	0.016	No
ARHGAP32		11q24.3	AMP	3	489	0.006	No
LINC01005		7q11.21	AMP	1	489	0.002	No
ARHGAP5-AS1		14q12	AMP	1	489	0.002	No
FAM187B		19q13.12	AMP	3	489	0.006	No
ELFN1		7p22.3	AMP	2	489	0.004	No
CGGBP1		3p11.1	AMP	2	489	0.004	No
NONO		Xq13.1	AMP	1	489	0.002	Yes
SMCO3		12p12.3	AMP	3	489	0.006	No
IFT140		16p13.3	AMP	6	489	0.012	No
UCHL3		13q22.2	AMP	3	489	0.006	No
PGAP3		17q12	AMP	2	489	0.004	No
ZNF496		1q44	AMP	2	489	0.004	No
INSR		19p13.2	AMP	1	489	0.002	Yes
PIR		Xp22.2	AMP	7	489	0.014	No
SLC25A51		9p13.2-p13.1	AMP	5	489	0.01	No
SMPX		Xp22.12	AMP	2	489	0.004	No
SMG1P3		16p12.2	AMP	5	489	0.01	No
UPK1B		3q13.32	AMP	2	489	0.004	No
ZNF536		19q12	AMP	1	489	0.002	No
RAX2		19p13.3	AMP	1	489	0.002	No
H2AC1		6p22.2	AMP	1	489	0.002	No
AFDN-DT		6q27	AMP	1	489	0.002	No
PABPC4L		4q28.3	AMP	1	489	0.002	No
FRK		6q22.1	AMP	1	489	0.002	No
CLVS2		6q22.31	AMP	2	489	0.004	No
UCN		2p23.3	AMP	2	489	0.004	No
LRRC63		13q14.13	AMP	1	489	0.002	No
ZNF248		10p11.21	AMP	3	489	0.006	No
INSL4		9p24.1	AMP	1	489	0.002	No
KMT2E		7q22.3	AMP	4	489	0.008	No
SGK3		8q13.1	AMP	32	489	0.065	No
COMMD3		10p12.2	AMP	2	489	0.004	No
SLC12A5		20q13.12	AMP	3	489	0.006	No
MED12L		3q25.1	AMP	6	489	0.012	No
NAT1		8p22	AMP	1	489	0.002	No
LINC02483		4q21.1	AMP	2	489	0.004	No
CACNA2D1-AS1		7q21.11	AMP	5	489	0.01	No
BOLA2		16p11.2	AMP	4	489	0.008	No
SIRT1		10q21.3	AMP	5	489	0.01	No
RNF175		4q31.3	AMP	1	489	0.002	No
SH3BP4		2q37.2	AMP	1	489	0.002	No
ESCO1		18q11.2	AMP	1	489	0.002	No
INTS1		7p22.3	AMP	2	489	0.004	No
PNMA8B		19q13.32	AMP	2	489	0.004	No
RDH11		14q24.1	AMP	2	489	0.004	No
SNX29		16p13.13-p13.12	AMP	5	489	0.01	Yes
MYDGF		19p13.3	AMP	1	489	0.002	No
ACSS2		20q11.22	AMP	3	489	0.006	No
ZFPM2		8q23	AMP	41	489	0.084	No
ZNF599		19q13.11	AMP	2	489	0.004	No
TMEM248		7q11.21	AMP	2	489	0.004	No
PDP1		8q22.1	AMP	40	489	0.082	No
ENOX1		13q14.11	AMP	3	489	0.006	No
SMG9		19q13.31	AMP	1	489	0.002	No
ARF5		7q32.1	AMP	2	489	0.004	No
NCS1		9q34.11	AMP	4	489	0.008	No
THSD1		13q14.3	AMP	1	489	0.002	No
ATP10D		4p12	AMP	2	489	0.004	No
MTHFD2L		4q13.3	AMP	3	489	0.006	No
ARF6		14q21.3	AMP	4	489	0.008	No
HPF1		4q33	AMP	2	489	0.004	No
KCNH3		12q13.12	AMP	1	489	0.002	No
CPXM1		20p13	AMP	1	489	0.002	No
MSS51		10q22.2	AMP	4	489	0.008	No
ANGPTL8		19p13.2	AMP	1	489	0.002	No
AMIGO1		1p13.3	AMP	1	489	0.002	No
GPR152		11q13.2	AMP	10	489	0.02	No
EGLN3		14q13.1	AMP	2	489	0.004	No
PSMG3-AS1		7p22.3	AMP	2	489	0.004	No
ARG1		6q23.2	AMP	1	489	0.002	No
LINGO1-AS1		15q24.3	AMP	1	489	0.002	No
PLS3-AS1		Xq23	AMP	1	489	0.002	No
DNTTIP1		20q13.12	AMP	3	489	0.006	No
CFAP70		10q22.2	AMP	4	489	0.008	No
CMAS		12p12.1	AMP	3	489	0.006	No
CSMD2-AS1		1p35.1	AMP	1	489	0.002	No
RPL18		19q13.33	AMP	2	489	0.004	No
STRIP2		7q32.1	AMP	3	489	0.006	No
DOC2GP		11q13.2	AMP	10	489	0.02	No
TMEM132B		12q24.31	AMP	4	489	0.008	No
PNCK		Xq28	AMP	1	489	0.002	No
ARG2		14q24.1	AMP	2	489	0.004	No
CNOT3		19q13.42	AMP	4	489	0.008	Yes
CRB1		1q31.3	AMP	2	489	0.004	No
KYAT3		1p22.2	AMP	2	489	0.004	No
ZC4H2		Xq11.2	AMP	3	489	0.006	No
RPL18A		19p13.11	AMP	2	489	0.004	No
SLC47A2		17p11.2	AMP	5	489	0.01	No
TBC1D24		16p13.3	AMP	6	489	0.012	No
MARCHF5		10q23.32-q23.33	AMP	2	489	0.004	No
SLITRK1		13q31.1	AMP	2	489	0.004	No
H1-10-AS1		3q21.3	AMP	8	489	0.016	No
PCED1B-AS1		12q13.11	AMP	1	489	0.002	No
PCNX3		11q13.1	AMP	5	489	0.01	No
CNOT2		12q15	AMP	5	489	0.01	No
NMRAL2P		3q27.2	AMP	7	489	0.014	No
RNF114		20q13.13	AMP	6	489	0.012	No
TMEM251		14q32.12	AMP	2	489	0.004	No
RPL19		17q12	AMP	1	489	0.002	No
POM121L1P		22q11.22	AMP	3	489	0.006	No
CFAP251		12q24.31	AMP	6	489	0.012	No
HHATL		3p22.1	AMP	2	489	0.004	No
SCAF4		21q22.11	AMP	1	489	0.002	No
TRIM16L		17p11.2	AMP	5	489	0.01	No
IRGC		19q13.31	AMP	1	489	0.002	No
RALGAPA1P1		9q31.2	AMP	4	489	0.008	No
RHOB		2p24.1	AMP	1	489	0.002	No
SLC35G5		8p23.1	AMP	3	489	0.006	No
CLEC19A		16p12.3	AMP	5	489	0.01	No
PGAP1		2q33.1	AMP	1	489	0.002	No
TRIM72		16p11.2	AMP	4	489	0.008	No
ZNF638		2p13.3-p13.2	AMP	2	489	0.004	No
LMCD1		3p25.3	AMP	2	489	0.004	No
RHOA		3p21.31	AMP	1	489	0.002	Yes
VAT1		17q21.31	AMP	1	489	0.002	No
RAD51AP2		2p24.2	AMP	1	489	0.002	No
ADPGK-AS1		15q24.1	AMP	1	489	0.002	No
SRP14-AS1		15q15.1	AMP	1	489	0.002	No
RABGAP1		9q33.2-q33.3	AMP	7	489	0.014	No
C1QTNF9B		13q12.12	AMP	2	489	0.004	No
RHOC		1p13.2	AMP	1	489	0.002	No
TRPC4AP		20q11.22	AMP	3	489	0.006	No
C16ORF97		16q12.1	AMP	2	489	0.004	No
METTL16		17p13.3	AMP	1	489	0.002	No
TMPRSS11A		4q13.2	AMP	1	489	0.002	No
COMMD8		4p12	AMP	2	489	0.004	No
STK25		2q37.3	AMP	2	489	0.004	No
ZNF689		16p11.2	AMP	4	489	0.008	No
TLCD2		17p13.3	AMP	1	489	0.002	No
CNGA2		Xq28	AMP	4	489	0.008	No
GLIS3-AS1		9p24.2	AMP	1	489	0.002	No
RASA4CP		7p13	AMP	1	489	0.002	No
SNORA70E		11q	AMP	3	489	0.006	No
ADH1A		4q23	AMP	2	489	0.004	No
ZNF841		19q13.41	AMP	3	489	0.006	No
LINC01550		14q32.2	AMP	2	489	0.004	No
NOP53		19q13.33	AMP	1	489	0.002	No
XRCC6P5		Xq22.1	AMP	1	489	0.002	No
RPS6KA6		Xq21.1	AMP	1	489	0.002	No
TRIM52		5q35.3	AMP	1	489	0.002	No
CRTAP		3p22.3	AMP	1	489	0.002	No
NUP85		17q25.1	AMP	3	489	0.006	No
PURPL		5p14.1	AMP	2	489	0.004	No
YLPM1		14q24.3	AMP	2	489	0.004	No
ADH1B		4q23	AMP	2	489	0.004	No
DNAAF11		8q24.22	AMP	34	489	0.07	No
ZNF615		19q13.41	AMP	3	489	0.006	No
CEBPA-DT		19q13.11	AMP	2	489	0.004	No
FTO		16q12.2	AMP	2	489	0.004	No
ATP1A1-AS1		1p13.1	AMP	1	489	0.002	No
NAA60		16p13.3	AMP	4	489	0.008	No
LINC00588		8q12.1	AMP	22	489	0.045	No
CARM1		19p13.2	AMP	1	489	0.002	Yes
LINC01467		14q31.1	AMP	2	489	0.004	No
LINC01446		7p12.1	AMP	1	489	0.002	No
ADH1C		4q23	AMP	2	489	0.004	No
HTATSF1		Xq26.3	AMP	2	489	0.004	No
ATG16L1		2q37.1	AMP	1	489	0.002	No
OBP2A		9q34.3	AMP	5	489	0.01	No
LRRTM4		2p12	AMP	2	489	0.004	No
CLRN3		10q26.2	AMP	2	489	0.004	No
C16ORF87		16q11.2	AMP	12	489	0.025	No
ZBTB20		3q13.31	AMP	4	489	0.008	Yes
UPK3B		7q11.23	AMP	5	489	0.01	No
NCOA2		8q13.3	AMP	35	489	0.072	Yes
GSDMA		17q21.1	AMP	2	489	0.004	No
ADH4		4q23	AMP	2	489	0.004	No
DCANP1		5q31.1	AMP	2	489	0.004	No
EIF3K		19q13.2	AMP	4	489	0.008	No
PILRA		7q22.1	AMP	8	489	0.016	No
MSLN		16p13.3	AMP	5	489	0.01	No
CCER2		19q13.2	AMP	3	489	0.006	No
GSX1		13q12.2	AMP	3	489	0.006	No
TES		7q31.2	AMP	4	489	0.008	No
CUEDC1		17q22	AMP	1	489	0.002	No
B3GAT1-DT		11q25	AMP	1	489	0.002	No
LINC02902		7p12.3	AMP	2	489	0.004	No
ADH5		4q23	AMP	1	489	0.002	No
FBXO47		17q12	AMP	3	489	0.006	No
TMC7		16p12.3	AMP	6	489	0.012	No
FAM120C		Xp11.22	AMP	1	489	0.002	No
P2RY10		Xq21.1	AMP	1	489	0.002	No
MRPL20		1p36.33	AMP	2	489	0.004	No
ENOX2		Xq26.1	AMP	2	489	0.004	No
SERBP1		1p31.3	AMP	1	489	0.002	No
UNC13B		9p13.3	AMP	5	489	0.01	No
MORN1		1p36.32	AMP	2	489	0.004	No
ODR4		1q31.1	AMP	2	489	0.004	No
NRDE2		14q32.11	AMP	2	489	0.004	No
GOLIM4		3q26.2	AMP	12	489	0.025	No
BAZ2B		2q24.2	AMP	3	489	0.006	No
NBR2		17q21.31	AMP	3	489	0.006	No
DYNLRB1		20q11.22	AMP	3	489	0.006	No
HNRNPR		1p36.12	AMP	1	489	0.002	No
CDH3		16q22.1	AMP	2	489	0.004	No
SLC35B1		17q21.33	AMP	3	489	0.006	No
NPAS1		19q13.32	AMP	1	489	0.002	No
FBN1		15q21.1	AMP	1	489	0.002	No
FRMPD4		Xp22.2	AMP	6	489	0.012	No
ZNF503		10q22.2	AMP	4	489	0.008	No
CDH4		20q13.33	AMP	4	489	0.008	No
IRF5		7q32.1	AMP	3	489	0.006	No
LINC01117		2q31.1	AMP	2	489	0.004	No
FAM167A-AS1		8p23.1	AMP	3	489	0.006	No
PNP		14q11.2	AMP	2	489	0.004	No
MTIF3		13q12.2	AMP	3	489	0.006	No
LRRC17		7q22.1	AMP	6	489	0.012	No
KIAA1671-AS1		22q11.23	AMP	1	489	0.002	No
LRRC77P		3q26.1-q26.2	AMP	12	489	0.025	No
PRPF19		11q12.2	AMP	1	489	0.002	No
LRCH3		3q29	AMP	6	489	0.012	No
LIX1L		1q21.1	AMP	5	489	0.01	No
CNN2		19p13.3	AMP	1	489	0.002	No
LINC00208		8p23.1	AMP	3	489	0.006	No
UBE2S		19q13.42	AMP	2	489	0.004	No
CDH2		18q12.1	AMP	2	489	0.004	No
IRF3		19q13.33	AMP	2	489	0.004	No
CCDC148-AS1		2q24.1	AMP	3	489	0.006	No
MEG9		14q32.31	AMP	3	489	0.006	No
SHISA2		13q12.13	AMP	2	489	0.004	No
FSCN3		7q32.1	AMP	2	489	0.004	No
LINC02873		11q24.3	AMP	3	489	0.006	No
LINC01192		3q26.1	AMP	8	489	0.016	No
IRF2		4q35.1	AMP	3	489	0.006	Yes
PLK3		1p34.1	AMP	1	489	0.002	No
NDUFAF2		5q12.1	AMP	2	489	0.004	No
ZNF117		7q11.21	AMP	2	489	0.004	No
SNORD115-20		15q11.2	AMP	6	489	0.012	No
CNN1		19p13.2	AMP	1	489	0.002	No
KRT76		12q13.13	AMP	5	489	0.01	No
DCAF7		17q23.3	AMP	2	489	0.004	No
RTL1		14q32.2	AMP	3	489	0.006	No
PAXIP1-DT		7q36.2	AMP	2	489	0.004	No
NLRP7		19q13.42	AMP	2	489	0.004	No
CNGA3		2q11.2	AMP	1	489	0.002	No
AP3S2		15q26.1	AMP	1	489	0.002	No
SMG1P5		16p11.2	AMP	4	489	0.008	No
LINC00839		10q11.21	AMP	4	489	0.008	No
TEKT4P2		21p11.2	AMP	4	489	0.008	No
LINC01103		2q12.1	AMP	2	489	0.004	No
SNORD18C		15q22.31	AMP	1	489	0.002	No
SNPH		20p13	AMP	1	489	0.002	No
RGSL1		1q25.3	AMP	2	489	0.004	No
RPL30		8q22.2	AMP	39	489	0.08	No
DEPTOR		8q24.12	AMP	34	489	0.07	No
SNORD115-16		15q11.2	AMP	7	489	0.014	No
LINC00645		14q12	AMP	1	489	0.002	No
NOVA2		19q13.32	AMP	2	489	0.004	No
C17ORF99		17q25.3	AMP	3	489	0.006	No
IRF1		5q31.1	AMP	1	489	0.002	Yes
RIPOR2		6p22.3	AMP	1	489	0.002	No
IQCH		15q23	AMP	1	489	0.002	No
NEXN-AS1		1p31.1	AMP	2	489	0.004	No
STX18-AS1		4p16.2	AMP	2	489	0.004	No
SLC35A2		Xp11.23	AMP	3	489	0.006	No
SNORD115-15		15q11.2	AMP	7	489	0.014	No
CENPBD1P1		19q13.43	AMP	1	489	0.002	No
INE1		Xp11.3	AMP	3	489	0.006	No
NOVA1		14q12	AMP	1	489	0.002	No
RPL28		19q13.42	AMP	2	489	0.004	No
SNORD115-18		15q11.2	AMP	7	489	0.014	No
ZSCAN12		6p22.1	AMP	1	489	0.002	No
KRTAP5-7		11q13.4	AMP	2	489	0.004	No
LRRC61		7q36.1	AMP	5	489	0.01	No
DACT3-AS1		19q13.32	AMP	1	489	0.002	No
CCN3		8q24.12	AMP	33	489	0.067	No
CDC14B		9q22.32-q22.33	AMP	5	489	0.01	No
RPL29		3p21.2	AMP	1	489	0.002	No
ARL11		13q14.2	AMP	1	489	0.002	No
SNORD115-17		15q11.2	AMP	7	489	0.014	No
PCDHA9		5q31.3	AMP	4	489	0.008	No
UGCG		9q31.3	AMP	6	489	0.012	No
LINC01094		4q21.21	AMP	3	489	0.006	No
ZFTA		11q13.1	AMP	1	489	0.002	No
PIAS1		15q23	AMP	1	489	0.002	No
NOTCH4		6p21.32	AMP	1	489	0.002	Yes
IRAK2		3p25.3	AMP	1	489	0.002	No
CNGA1		4p12	AMP	2	489	0.004	No
TBKBP1		17q21.32	AMP	3	489	0.006	No
UGDH		4p14	AMP	1	489	0.002	No
NOTCH3		19p13.12	AMP	3	489	0.006	Yes
TCAP		17q12	AMP	2	489	0.004	No
COG7		16p12.2	AMP	5	489	0.01	No
SPDYE7P		7q11.23	AMP	2	489	0.004	No
ITGA6		2q31.1	AMP	1	489	0.002	No
NOTCH2		1p12	AMP	5	489	0.01	Yes
STARD8		Xq13.1	AMP	3	489	0.006	No
KRTAP5-11		11q13.4	AMP	2	489	0.004	No
LARS2-AS1		3p21.31	AMP	2	489	0.004	No
CDC14A		1p21.2	AMP	3	489	0.006	No
MIGA1		1p31.1	AMP	3	489	0.006	No
NPY		7p15.3	AMP	7	489	0.014	No
SLC9A9-AS1		3q24	AMP	5	489	0.01	No
KMT2B		19q13.12	AMP	2	489	0.004	Yes
IRAK1		Xq28	AMP	1	489	0.002	No
PRPF18		10p13	AMP	1	489	0.002	No
LIN54		4q21.22	AMP	1	489	0.002	No
CNGB1		16q21	AMP	2	489	0.004	No
NOTCH1		9q34.3	AMP	5	489	0.01	Yes
RBM33		7q36.3	AMP	2	489	0.004	No
RND3		2q23.3	AMP	1	489	0.002	No
LINC01304		2p25.3	AMP	4	489	0.008	No
IPW		15q11.2	AMP	6	489	0.012	No
TMC8		17q25.3	AMP	3	489	0.006	No
CDK10		16q24.3	AMP	1	489	0.002	No
TYW1B		7q11.22-q11.23	AMP	2	489	0.004	No
TMEM119		12q23.3	AMP	5	489	0.01	No
ZCWPW2		3p24.1	AMP	1	489	0.002	No
LINC00210		1q41	AMP	1	489	0.002	No
KIAA1143		3p21.31	AMP	1	489	0.002	No
SIGLECL1		19q13.41	AMP	2	489	0.004	No
LDOC1		Xq27.1	AMP	1	489	0.002	No
KCNG3		2p21	AMP	1	489	0.002	No
UQCRBP1		Xp11.21	AMP	1	489	0.002	No
LCORL		4p15.31	AMP	1	489	0.002	No
MAL2		8q24.12	AMP	34	489	0.07	No
BTNL8		5q35.3	AMP	1	489	0.002	No
CRYBG2		1p36.11	AMP	1	489	0.002	No
LRRC10B		11q12.2	AMP	1	489	0.002	No
HSPBP1		19q13.42	AMP	2	489	0.004	No
ODAM		4q13.3	AMP	1	489	0.002	No
CTNNBL1		20q11.23	AMP	3	489	0.006	No
C1QTNF3-AMACR		5p13.2	AMP	3	489	0.006	No
EDC4		16q22.1	AMP	1	489	0.002	No
ANTKMT		16p13.3	AMP	5	489	0.01	No
SMG1P7		16q22.1	AMP	2	489	0.004	No
TMCC3		12q22	AMP	7	489	0.014	No
PFN1P2		1p11.2	AMP	5	489	0.01	No
GABPB1-IT1		15q21.2	AMP	1	489	0.002	No
SIGLEC17P		19q13.41	AMP	2	489	0.004	No
DRAIC		15q23	AMP	2	489	0.004	No
ARHGAP4		Xq28	AMP	1	489	0.002	No
TMEM160		19q13.32	AMP	1	489	0.002	No
LOC388282		16q21	AMP	1	489	0.002	No
CEP85		1p36.11	AMP	1	489	0.002	No
LY96		8q21.11	AMP	37	489	0.076	No
GATAD2B		1q21.3	AMP	10	489	0.02	No
ZWILCH		15q22.31	AMP	1	489	0.002	No
YWHAEP7		17q12	AMP	1	489	0.002	No
KLK9		19q13.41	AMP	3	489	0.006	No
LINC00945		21q22.11	AMP	1	489	0.002	No
ARHGAP5		14q12	AMP	1	489	0.002	No
IFT22		7q22.1	AMP	5	489	0.01	No
PLD3		19q13.2	AMP	1	489	0.002	No
CRTAM		11q24.1	AMP	2	489	0.004	No
DDX31		9q34.13	AMP	6	489	0.012	No
RPL24		3q12.3	AMP	2	489	0.004	No
TRIML1		4q35.2	AMP	1	489	0.002	No
TENM2		5q34	AMP	6	489	0.012	No
MRPS34		16p13.3	AMP	7	489	0.014	No
UTP20		12q23.2	AMP	7	489	0.014	No
LINC00380		13q31.3	AMP	4	489	0.008	No
ARHGAP6		Xp22.2	AMP	7	489	0.014	No
SATB2-AS1		2q33.1	AMP	2	489	0.004	No
RPL36A-HNRNPH2		Xq22.1	AMP	1	489	0.002	No
RMND5A		2p11.2	AMP	1	489	0.002	No
TM4SF19-DYNLT2B		3q29	AMP	6	489	0.012	No
RNF20		9q31.1	AMP	5	489	0.01	No
UCP2		11q13.4	AMP	2	489	0.004	No
PPP1R15A		19q13.2	AMP	2	489	0.004	No
FUNDC2		Xq28	AMP	1	489	0.002	No
KRTAP2-2		17q21.2	AMP	1	489	0.002	No
MROH6		8q24.3	AMP	30	489	0.061	No
ADH6		4q23	AMP	2	489	0.004	No
GALNT16		14q24.1	AMP	2	489	0.004	No
CISD3		17q12	AMP	3	489	0.006	No
OR10V1		11q12.1	AMP	2	489	0.004	No
DNAH10		12q24.31	AMP	2	489	0.004	No
GRID2IP		7p22.1	AMP	2	489	0.004	No
ARHGDIA		17q25.3	AMP	2	489	0.004	No
VTI1B		14q24.1	AMP	2	489	0.004	No
LINC00367		13q12.11	AMP	3	489	0.006	No
TMX4		20p12.3	AMP	4	489	0.008	No
LRRIQ4		3q26.2	AMP	17	489	0.035	No
UCP3		11q13.4	AMP	2	489	0.004	No
RPL26		17p13.1	AMP	1	489	0.002	No
ZFP90		16q22.1	AMP	2	489	0.004	No
MCHR2-AS1		6q16.2-q16.3	AMP	1	489	0.002	No
TTLL3		3p25.3	AMP	1	489	0.002	No
ADH7		4q23	AMP	2	489	0.004	No
INE2		Xp22.2	AMP	8	489	0.016	No
ARHGDIB		12p12.3	AMP	3	489	0.006	No
POC1B		12q21.33	AMP	6	489	0.012	No
LINC00397		13q31.2	AMP	4	489	0.008	No
SERTAD4		1q32.2	AMP	1	489	0.002	No
SAMD7		3q26.2	AMP	17	489	0.035	No
RHOH		4p14	AMP	1	489	0.002	Yes
RPL27		17q21.31	AMP	1	489	0.002	No
UFD1		22q11.21	AMP	1	489	0.002	No
LRRC66		4q12	AMP	1	489	0.002	No
MAPKAPK5		12q24.12-q24.13	AMP	4	489	0.008	No
RILPL2		12q24.31	AMP	2	489	0.004	No
ADK		10q22.2	AMP	3	489	0.006	No
ARHGDIG		16p13.3	AMP	5	489	0.01	No
MEPCE		7q22.1	AMP	8	489	0.016	No
CPEB2-DT		4p15.33-p15.32	AMP	2	489	0.004	No
EMC10		19q13.33	AMP	1	489	0.002	No
CARMN		5q32	AMP	3	489	0.006	No
DCTPP1		16p11.2	AMP	4	489	0.008	No
OCIAD1		4p11	AMP	3	489	0.006	No
PCSK1N		Xp11.23	AMP	3	489	0.006	No
CNTFR		9p13.3	AMP	3	489	0.006	No
KLHL22		22q11.21	AMP	1	489	0.002	No
HOXB13		17q21.32	AMP	4	489	0.008	Yes
LDLRAD3		11p13	AMP	1	489	0.002	No
HMGA1P7		6q23.2	AMP	1	489	0.002	No
POLA2		11q13.1	AMP	5	489	0.01	No
PYROXD1		12p12.1	AMP	3	489	0.006	No
ATP2B1-AS1		12q21.33	AMP	6	489	0.012	No
SBF1P1		8q12.1	AMP	25	489	0.051	No
IRF2BP1		19q13.32	AMP	2	489	0.004	No
FZR1		19p13.3	AMP	2	489	0.004	No
ADORA2A		22q11.23	AMP	1	489	0.002	No
MS4A8		11q12.2	AMP	1	489	0.002	No
POLL		10q24.32	AMP	1	489	0.002	No
FAM157A		3q29	AMP	6	489	0.012	No
ADORA1		1q32.1	AMP	2	489	0.004	No
CNTN1		12q12	AMP	2	489	0.004	No
OR8B4		11q24.2	AMP	1	489	0.002	No
ACTR5		20q11.23	AMP	2	489	0.004	No
LINC02150		5p15.1	AMP	1	489	0.002	No
TLN2		15q22.2	AMP	2	489	0.004	No
AKNAD1		1p13.3	AMP	1	489	0.002	No
RABGEF1		7q11.21	AMP	2	489	0.004	No
LINC00173		12q24.22	AMP	8	489	0.016	No
C15ORF61		15q23	AMP	1	489	0.002	No
JAML		11q23.3	AMP	2	489	0.004	No
CNTF		11q12.1	AMP	1	489	0.002	No
RRP7A		22q13.2	AMP	1	489	0.002	No
OR8D2		11q24.2	AMP	1	489	0.002	No
RIOX2		3q11.2	AMP	4	489	0.008	No
PARP9		3q21.1	AMP	2	489	0.004	No
LRRC70		5q12.1	AMP	2	489	0.004	No
ATAD5		17q11.2	AMP	1	489	0.002	No
TOR1B		9q34.11	AMP	4	489	0.008	No
LINC01869		19q13.33	AMP	2	489	0.004	No
MIR9-1HG		1q22	AMP	4	489	0.008	No
SPACA5B		Xp11.23	AMP	2	489	0.004	No
ZNF658		9q21.11	AMP	6	489	0.012	No
TAOK3		12q24.23	AMP	10	489	0.02	No
CAP1		1p34.2	AMP	1	489	0.002	No
RAB6D		2q21.1	AMP	1	489	0.002	No
STK39		2q24.3	AMP	1	489	0.002	No
ZPLD2P		1p36.11	AMP	1	489	0.002	No
PLEKHB2		2q21.1	AMP	1	489	0.002	No
GDF11		12q13.2	AMP	4	489	0.008	No
KIFC2		8q24.3	AMP	31	489	0.063	No
KIRREL3-AS3		11q24.2	AMP	1	489	0.002	No
LINC02101		5q11.2	AMP	1	489	0.002	No
MAGIX		Xp11.23	AMP	3	489	0.006	No
RPL39		Xq24	AMP	1	489	0.002	No
ABITRAM		9q31.3	AMP	5	489	0.01	No
TMEM97		17q11.2	AMP	2	489	0.004	No
EPN3		17q21.33	AMP	3	489	0.006	No
PHF19		9q33.2	AMP	4	489	0.008	No
OSMR-AS1		5p13.1	AMP	2	489	0.004	No
SETD6		16q21	AMP	2	489	0.004	Yes
RPL41		12q13	AMP	3	489	0.006	No
KCNMB4		12q15	AMP	5	489	0.01	No
RNF125		18q12.1	AMP	2	489	0.004	No
DPP9-AS1		19p13.3	AMP	1	489	0.002	No
SEC23A		14q21.1	AMP	5	489	0.01	No
ZNF443		19p13.2	AMP	1	489	0.002	No
PPP1R21		2p16.3	AMP	2	489	0.004	No
TM7SF2		11q13.1	AMP	5	489	0.01	No
CBR4		4q32.3	AMP	2	489	0.004	No
CDH15		16q24.3	AMP	1	489	0.002	No
ITGA4		2q31.3	AMP	1	489	0.002	No
PUSL1		1p36.33	AMP	2	489	0.004	No
OR8U1		11q12.1	AMP	1	489	0.002	No
CD96		3q13.13-q13.2	AMP	2	489	0.004	No
SSX9P		Xp11.23	AMP	3	489	0.006	No
FCGR2A		1q23.3	AMP	4	489	0.008	No
LINC00844		10q21.1	AMP	1	489	0.002	No
TRAPPC10		21q22.3	AMP	1	489	0.002	No
CDH16		16q22.1	AMP	1	489	0.002	No
ITGA3		17q21.33	AMP	4	489	0.008	No
ZNF585A		19q13.12	AMP	2	489	0.004	No
POGLUT2		13q33.1	AMP	3	489	0.006	No
ACOX2		3p14.3	AMP	3	489	0.006	No
CREB3		9p13.3	AMP	5	489	0.01	No
BEND4		4p13	AMP	1	489	0.002	No
MTOR		1p36.22	AMP	1	489	0.002	Yes
ADAMTS4		1q23.3	AMP	3	489	0.006	No
SERPINA13P		14q32.13	AMP	3	489	0.006	No
TRIB1		8q24.13	AMP	37	489	0.076	No
COL1A1		17q21.33	AMP	3	489	0.006	Yes
CAPN13		2p23.1	AMP	1	489	0.002	No
ELOVL6		4q25	AMP	2	489	0.004	No
CCDC37-DT		3q21.3	AMP	5	489	0.01	No
TMEM132C		12q24.32	AMP	2	489	0.004	No
LRRC41		1p34.1-p33	AMP	1	489	0.002	No
GPA33		1q24.1	AMP	3	489	0.006	No
LINC00615		12q21.33	AMP	6	489	0.012	No
FCGR1B		1p11.2	AMP	5	489	0.01	No
ELOVL3		10q24.32	AMP	2	489	0.004	No
COL1A2		7q21.3	AMP	7	489	0.014	No
ITGA2		5q11.2	AMP	1	489	0.002	No
GLYATL1		11q12.1	AMP	1	489	0.002	No
PPIAP30		10p13	AMP	2	489	0.004	No
FASTKD3		5p15.31	AMP	1	489	0.002	No
STX6		1q25.3	AMP	2	489	0.004	No
RCAN3AS		1p36.11	AMP	1	489	0.002	No
GFY		19q13.33	AMP	3	489	0.006	No
C5ORF58		5q35.1	AMP	6	489	0.012	No
ADAMTS2		5q35.3	AMP	5	489	0.01	No
CCDC142		2p13.1	AMP	2	489	0.004	No
BOK-AS1		2q37.3	AMP	2	489	0.004	No
GAGE10		Xp11.23	AMP	2	489	0.004	No
IFNLR1		1p36.11	AMP	1	489	0.002	No
ITGA1		5q11.2	AMP	1	489	0.002	No
TMEM109		11q12.2	AMP	1	489	0.002	No
COQ7		16p12.3	AMP	6	489	0.012	No
WFDC10B		20q13.12	AMP	3	489	0.006	No
TMEM25		11q23.3	AMP	2	489	0.004	No
ADAMTS3		4q13.3	AMP	4	489	0.008	No
C2ORF49		2q12.2	AMP	1	489	0.002	No
TPTE2		13q12.11	AMP	4	489	0.008	No
C19ORF47		19q13.2	AMP	1	489	0.002	No
CDH12		5p14.3	AMP	3	489	0.006	No
PLIN3		19p13.3	AMP	1	489	0.002	No
LINC01187		5q35.1	AMP	6	489	0.012	No
DSCC1		8q24.12	AMP	33	489	0.067	No
PTPN5		11p15.1	AMP	2	489	0.004	No
SNORD115-14		15q11.2	AMP	7	489	0.014	No
ISL1		5q11.1	AMP	1	489	0.002	No
STT3B		3p23	AMP	2	489	0.004	No
MFSD10		4p16.3	AMP	1	489	0.002	No
HTT-AS		4p16.3	AMP	2	489	0.004	No
SNHG20		17q25.2	AMP	3	489	0.006	No
ZBTB7A		19p13.3	AMP	1	489	0.002	Yes
ASB10		7q36.1	AMP	5	489	0.01	No
HAVCR2		5q33.3	AMP	5	489	0.01	No
SNORD115-13		15q11.2	AMP	7	489	0.014	No
CDH11		16q21	AMP	1	489	0.002	Yes
TLR5		1q41	AMP	1	489	0.002	No
TBC1D15		12q21.1	AMP	3	489	0.006	No
PTPRZ1		7q31.32	AMP	7	489	0.014	No
UGT2B15		4q13.2	AMP	2	489	0.004	No
SNORD115-5		15q11.2	AMP	7	489	0.014	No
AACS		12q24.31	AMP	4	489	0.008	No
ZNF649-AS1		19q13.41	AMP	3	489	0.006	No
FCER1G		1q23.3	AMP	3	489	0.006	No
LINC01621		6q14.1	AMP	1	489	0.002	No
SNORD115-4		15q11.2	AMP	6	489	0.012	No
YARS1		1p35.1	AMP	4	489	0.008	No
MYBPC1		12q23.2	AMP	6	489	0.012	No
RPL38		17q25.1	AMP	3	489	0.006	No
UGT2B17		4q13.2	AMP	2	489	0.004	No
FAM104B		Xp11.21	AMP	1	489	0.002	No
SNORD115-3		15q11.2	AMP	6	489	0.012	No
KMO		1q43	AMP	3	489	0.006	No
MYBL1		8q13.1	AMP	30	489	0.061	No
NPM1		5q35.1	AMP	6	489	0.012	Yes
CDH9		5p14.1	AMP	2	489	0.004	No
LMF1		16p13.3	AMP	5	489	0.01	No
TSPAN7		Xp11.4	AMP	5	489	0.01	No
ZFYVE16		5q14.1	AMP	1	489	0.002	No
SNORD115-7		15q11.2	AMP	6	489	0.012	No
PAGE5		Xp11.21	AMP	1	489	0.002	No
ODAD1		19q13.33	AMP	2	489	0.004	No
KCTD14		11q14.1	AMP	3	489	0.006	No
FCER1A		1q23.2	AMP	3	489	0.006	No
NPHS1		19q13.12	AMP	2	489	0.004	No
PICALM		11q14.2	AMP	4	489	0.008	Yes
CDH10		5p14.2-p14.1	AMP	2	489	0.004	No
ISG20		15q26.1	AMP	1	489	0.002	No
EXO5		1p34.2	AMP	1	489	0.002	No
KRT26		17q21.2	AMP	1	489	0.002	No
LINC00348		13q21.33	AMP	2	489	0.004	No
TSPAN8		12q21.1	AMP	4	489	0.008	No
SNORD115-6		15q11.2	AMP	6	489	0.012	No
PTX3		3q25.32	AMP	5	489	0.01	No
UMOD		16p12.3	AMP	4	489	0.008	No
ZBTB10		8q21.13	AMP	40	489	0.082	No
MS4A2		11q12.1	AMP	1	489	0.002	No
PDXK		21q22.3	AMP	1	489	0.002	No
PPM1K		4q22.1	AMP	3	489	0.006	No
MX2		21q22.3	AMP	1	489	0.002	No
RPH3AL		17p13.3	AMP	1	489	0.002	No
MYO16-AS1		13q33.3	AMP	2	489	0.004	No
TM4SF4		3q25.1	AMP	6	489	0.012	No
LINC00572		13q12.3	AMP	3	489	0.006	No
TMPRSS11F		4q13.2	AMP	1	489	0.002	No
BIRC6		2p22.3	AMP	2	489	0.004	No
ENKUR		10p12.1	AMP	2	489	0.004	No
JADE3		Xp11.3	AMP	3	489	0.006	No
ENO1-AS1		1p36.23	AMP	2	489	0.004	No
FBP1		9q22.32	AMP	3	489	0.006	No
SNN		16p13.13	AMP	5	489	0.01	No
MKNK1		1p33	AMP	1	489	0.002	Yes
DLK2		6p21.1	AMP	1	489	0.002	No
TIMD4		5q33.3	AMP	5	489	0.01	No
MXRA7		17q25.1	AMP	2	489	0.004	No
DTX2P1-UPK3BP1-PMS2P11		7q11.23	AMP	5	489	0.01	No
LINC01210		3q22.3	AMP	6	489	0.012	No
CDH8		16q21	AMP	1	489	0.002	No
IRS1		2q36.3	AMP	1	489	0.002	Yes
SUSD6		14q24.1	AMP	2	489	0.004	No
SNORD115-8		15q11.2	AMP	6	489	0.012	No
MAGED1		Xp11.22	AMP	1	489	0.002	Yes
PLEKHG5		1p36.31	AMP	1	489	0.002	No
TSPAN6		Xq22.1	AMP	1	489	0.002	No
ZNF747		16p11.2	AMP	4	489	0.008	No
FCAR		19q13.42	AMP	3	489	0.006	No
RRP1		21q22.3	AMP	1	489	0.002	No
CNR2		1p36.11	AMP	1	489	0.002	No
NPC1		18q11.2	AMP	1	489	0.002	No
ZNF280A		22q11.22	AMP	3	489	0.006	No
HCG18		6p22.1	AMP	1	489	0.002	No
SNORD115-11		15q11.2	AMP	7	489	0.014	No
CDH5		16q21	AMP	1	489	0.002	No
QRFP		9q34.12	AMP	4	489	0.008	No
CDH6		5p13.3	AMP	3	489	0.006	No
NPAT		11q22.3	AMP	3	489	0.006	No
EFEMP1		2p16.1	AMP	3	489	0.006	No
XAGE2		Xp11.22	AMP	1	489	0.002	No
HCG17		6p22.1	AMP	1	489	0.002	No
GPR137B		1q42.3	AMP	2	489	0.004	No
PCLAF		15q22.31	AMP	1	489	0.002	No
SNORD115-10		15q11.2	AMP	8	489	0.016	No
CHCHD4		3p25.1	AMP	1	489	0.002	No
TRIM29		11q23.3	AMP	2	489	0.004	No
CCDC86		11q12.2	AMP	1	489	0.002	No
KRTAP4-11		17q21.2	AMP	1	489	0.002	No
C21ORF62		21q22.11	AMP	2	489	0.004	No
PLXNB2		22q13.33	AMP	2	489	0.004	No
OR8D1		11q24.2	AMP	1	489	0.002	No
PPP4R2		3p13	AMP	1	489	0.002	Yes
C1QL4		12q13.12	AMP	2	489	0.004	No
MRPL16		11q12.1	AMP	2	489	0.004	No
MRAP		21q22.11	AMP	2	489	0.004	No
CNIH2		11q13.2	AMP	6	489	0.012	No
SNORD115-12		15q11.2	AMP	7	489	0.014	No
SPANXN5		Xp11.22	AMP	1	489	0.002	No
LINC02201		5q23.2	AMP	1	489	0.002	No
LPCAT2		16q12.2	AMP	2	489	0.004	No
UGP2		2p15	AMP	2	489	0.004	No
C1ORF127		1p36.22	AMP	1	489	0.002	No
NDRG3		20q11.23	AMP	3	489	0.006	No
IFNG-AS1		12q15	AMP	4	489	0.008	No
TPRX1		19q13.33	AMP	1	489	0.002	No
SPATA31A5		9q12	AMP	6	489	0.012	No
SLC41A3		3q21.2-q21.3	AMP	6	489	0.012	No
RAP2C-AS1		Xq26.2	AMP	1	489	0.002	No
NDRG2		14q11.2	AMP	2	489	0.004	No
MAGEA9B		Xq28	AMP	5	489	0.01	No
MYC		8q24.21	AMP	40	489	0.082	Yes
ADORA3		1p13.2	AMP	1	489	0.002	No
LINC01933		5q33.1	AMP	2	489	0.004	No
MICAL1		6q21	AMP	1	489	0.002	No
LSM5		7p14.3	AMP	6	489	0.012	No
AEN		15q26.1	AMP	1	489	0.002	No
SUSD2		22q11.23	AMP	1	489	0.002	No
NEIL2		8p23.1	AMP	3	489	0.006	No
RPL34		4q25	AMP	2	489	0.004	No
BRD9		5p15.33	AMP	2	489	0.004	No
ADPRH		3q13.33	AMP	1	489	0.002	No
CAPRIN2		12p11.21	AMP	2	489	0.004	No
KRT78		12q13.13	AMP	6	489	0.012	No
NBPF13P		1q21.1	AMP	5	489	0.01	No
ATF7IP2		16p13.2-p13.13	AMP	5	489	0.01	No
FAR2P1		2q21.1	AMP	1	489	0.002	No
MYBPH		1q32.1	AMP	2	489	0.004	No
PLEKHH2		2p21	AMP	1	489	0.002	No
SLC7A11		4q28.3	AMP	1	489	0.002	No
ZNF253		19p13.11	AMP	1	489	0.002	No
KIF26A		14q32.33	AMP	2	489	0.004	No
UGT2B4		4q13.3	AMP	2	489	0.004	No
RPL35A		3q29	AMP	6	489	0.012	No
PTPRO		12p12.3	AMP	3	489	0.006	Yes
DEGS1		1q42.11	AMP	1	489	0.002	No
CRTC3		15q26.1	AMP	1	489	0.002	Yes
KIAA1217		10p12.2-p12.1	AMP	2	489	0.004	No
MLEC		12q24.31	AMP	5	489	0.01	No
RPL36AL		14q21.3	AMP	4	489	0.008	No
UGT2B7		4q13.2	AMP	2	489	0.004	No
ZNF337		20p11.21	AMP	3	489	0.006	No
PTPRR		12q15	AMP	3	489	0.006	No
REX1BD		19p13.11	AMP	1	489	0.002	No
NAA30		14q22.3	AMP	2	489	0.004	No
FCGR1A		1q21.2	AMP	5	489	0.01	No
IZUMO1		19q13.33	AMP	2	489	0.004	No
PARP4		13q12.12	AMP	1	489	0.002	No
THOC5		22q12.2	AMP	1	489	0.002	No
MYBPC2		19q13.33	AMP	1	489	0.002	No
BTNL2		6p21.32	AMP	1	489	0.002	No
GINS3		16q21	AMP	2	489	0.004	No
PLA2G15		16q22.1	AMP	1	489	0.002	No
RPL37		5p13.1	AMP	2	489	0.004	No
STPG2		4q22.3-q23	AMP	3	489	0.006	No
TOX		8q12.1	AMP	22	489	0.045	No
UGT2B10		4q13.2	AMP	2	489	0.004	No
NAT9		17q25.2	AMP	3	489	0.006	No
TEPP		16q21	AMP	2	489	0.004	No
VPS37C		11q12.2	AMP	1	489	0.002	No
MAMSTR		19q13.33	AMP	2	489	0.004	No
CCDC158		4q21.1	AMP	2	489	0.004	No
RASGEF1B		4q21.21	AMP	2	489	0.004	No
TRARG1		17p13.3	AMP	2	489	0.004	No
ZSCAN18		19q13.43	AMP	2	489	0.004	No
DENR		12q24.31	AMP	4	489	0.008	No
SDHAF2		11q12.2	AMP	1	489	0.002	Yes
PRSS40A		2q21.1	AMP	1	489	0.002	No
MYBL2		20q13.12	AMP	4	489	0.008	No
SUCLG2-AS1		3p14.1	AMP	2	489	0.004	No
PPY2P		17q11.2	AMP	2	489	0.004	No
SPTBN5		15q21	AMP	1	489	0.002	No
ADRA1D		20p13	AMP	1	489	0.002	No
KCNJ18		17p11.2	AMP	5	489	0.01	No
ADGRG7		3q12.2	AMP	3	489	0.006	No
CADM4		19q13.31	AMP	1	489	0.002	No
ZMYND8		20q13.12	AMP	4	489	0.008	No
ADM2		22q13.33	AMP	2	489	0.004	No
LYSMD3		5q14.3	AMP	1	489	0.002	No
ADRA1B		5q33.3	AMP	4	489	0.008	No
GUCY2GP		10q25.2	AMP	1	489	0.002	No
TNRC6C		17q25.3	AMP	3	489	0.006	No
C1QL2		2q14.2	AMP	1	489	0.002	No
PPP6R3		11q13	AMP	8	489	0.016	No
ARHGAP33		19q13.12	AMP	2	489	0.004	No
COL4A2		13q34	AMP	3	489	0.006	No
ZNF514		2q11.1	AMP	3	489	0.006	No
SPEF2		5p13.2	AMP	3	489	0.006	No
ADRA1A		8p21.2	AMP	2	489	0.004	No
TEX36		10q26.13	AMP	3	489	0.006	No
COL3A1		2q32.2	AMP	1	489	0.002	No
PINK1-AS		1p36.12	AMP	1	489	0.002	No
CBLN2		18q22.3	AMP	1	489	0.002	No
KIAA1586		6p12.1	AMP	1	489	0.002	No
BRF2		8p11.23	AMP	15	489	0.031	No
PARP10		8q24.3	AMP	31	489	0.063	No
ZNF771		16p11.2	AMP	4	489	0.008	No
PYY2		17q11.2	AMP	2	489	0.004	No
OTOA		16p12.2	AMP	5	489	0.01	No
LSR		19q13.12	AMP	3	489	0.006	No
ORAI1		12q24.31	AMP	5	489	0.01	No
A1CF		10q11.23	AMP	1	489	0.002	No
SLC9A4		2q12.1	AMP	1	489	0.002	No
COL4A1		13q34	AMP	3	489	0.006	No
PIWIL4		11q21	AMP	2	489	0.004	No
LINC01551		14q12	AMP	1	489	0.002	No
NRSN2-AS1		20p13	AMP	2	489	0.004	No
FAM110D		1p36.11	AMP	1	489	0.002	No
EXD3		9q34.3	AMP	7	489	0.014	No
OR10G4		11q24.2	AMP	1	489	0.002	No
FBXO34		14q22.3	AMP	2	489	0.004	No
LINC01250		2p25.3	AMP	4	489	0.008	No
ANKRD52		12q13.3	AMP	1	489	0.002	No
NGRN		15q26.1	AMP	1	489	0.002	No
LINC01743		1q44	AMP	2	489	0.004	No
LRRC58		3q13.33	AMP	2	489	0.004	No
FAM3B		21q22.3	AMP	1	489	0.002	No
WASH8P		12p13.33	AMP	1	489	0.002	No
TSSK2		22q11.21	AMP	1	489	0.002	No
H2BW4P		Xq22.2	AMP	1	489	0.002	No
TRMT10C		3q12.3	AMP	2	489	0.004	No
COL2A1		12q13.11	AMP	1	489	0.002	Yes
NANOS1		10q26.11	AMP	1	489	0.002	No
OR10G7		11q24.2	AMP	1	489	0.002	No
KLHL26		19p13.11	AMP	1	489	0.002	No
RSPO3		6q22.33	AMP	1	489	0.002	Yes
LINC00941		12p11.21	AMP	3	489	0.006	No
EXOSC6		16q22.1	AMP	2	489	0.004	Yes
CCDC69		5q33.1	AMP	2	489	0.004	No
MAP6D1		3q27.1	AMP	6	489	0.012	No
MRPL12		17q25.3	AMP	2	489	0.004	No
MS4A4A		11q12.2	AMP	1	489	0.002	No
ITPRIPL1		2q11.2	AMP	3	489	0.006	No
EMBP1		1p11.2	AMP	5	489	0.01	No
HAUS4		14q11.2	AMP	1	489	0.002	No
FBXW7		4q31.3	AMP	2	489	0.004	Yes
AGBL4		1p33	AMP	3	489	0.006	No
SESN3		11q21	AMP	1	489	0.002	Yes
VGLL2		6q22.1	AMP	2	489	0.004	No
UQCRB		8q22.1	AMP	38	489	0.078	No
LINC01335		5q13.3	AMP	1	489	0.002	No
C10ORF71		10q11.23	AMP	2	489	0.004	No
LRRC69		8q21.3	AMP	37	489	0.076	No
MRPS12		19q13.2	AMP	3	489	0.006	No
THEM6		8q24.3	AMP	29	489	0.059	No
ZIM2		19q13.43	AMP	3	489	0.006	No
UEVLD		11p15.1	AMP	2	489	0.004	No
SCHIP1		3q25.33	AMP	9	489	0.018	No
WDR90		16p13.3	AMP	5	489	0.01	Yes
ALPK2		18q21.31-q21.32	AMP	4	489	0.008	No
ZC3H10		12q13.2	AMP	3	489	0.006	No
FCRL5		1q23.1	AMP	3	489	0.006	No
MYH2		17p13.1	AMP	2	489	0.004	No
ITGB1		10p11.22	AMP	2	489	0.004	No
NPY1R		4q32.2	AMP	3	489	0.006	No
CTAGE4		7q35	AMP	7	489	0.014	No
SPTLC2		14q24.3	AMP	1	489	0.002	No
OR6X1		11q24.1	AMP	2	489	0.004	No
INTS6L		Xq26.3	AMP	1	489	0.002	No
IDI1		10p15.3	AMP	2	489	0.004	No
CDK9		9q34.11	AMP	8	489	0.016	No
LDLRAP1		1p36.11	AMP	1	489	0.002	No
NPTX2		7q22.1	AMP	8	489	0.016	No
FDPS		1q22	AMP	9	489	0.018	No
LITAF		16p13.13	AMP	5	489	0.01	No
RBMX		Xq26.3	AMP	2	489	0.004	No
OR6M1		11q24.1	AMP	2	489	0.004	No
IDH3G		Xq28	AMP	1	489	0.002	No
KRTAP4-4		17q21.2	AMP	1	489	0.002	No
ZNF449		Xq26.3	AMP	1	489	0.002	No
ITGAX		16p11.2	AMP	4	489	0.008	No
TMEM147		19q13.12	AMP	3	489	0.006	No
WSB1		17q11.1	AMP	2	489	0.004	No
LINC00847		5q35.3	AMP	1	489	0.002	No
CDC45		22q11.21	AMP	1	489	0.002	No
ERCC6-PGBD3		10q11	AMP	2	489	0.004	No
NPTX1		17q25.3	AMP	1	489	0.002	No
CLVS1		8q12.2-q12.3	AMP	24	489	0.049	No
RAB30		11q14.1	AMP	3	489	0.006	No
TBPL1		6q23.2	AMP	2	489	0.004	No
IDH3B		20p13	AMP	1	489	0.002	No
COL5A1		9q34.3	AMP	7	489	0.014	No
CCT6B		17q12	AMP	2	489	0.004	Yes
TANC2		17q23.2-q23.3	AMP	3	489	0.006	No
LINC02067		3q26.1	AMP	7	489	0.014	No
NPR3		5p13.3	AMP	2	489	0.004	No
CNPY3		6p21.1	AMP	1	489	0.002	No
LINC02347		12q24.32	AMP	4	489	0.008	No
FDFT1		8p23.1	AMP	3	489	0.006	No
GDF15		19p13.11	AMP	1	489	0.002	No
NT5C1A		1p34.2	AMP	1	489	0.002	No
BARHL2		1p22.2	AMP	2	489	0.004	No
DUSP26		8p12	AMP	4	489	0.008	No
CDK8		13q12.13	AMP	2	489	0.004	Yes
CCT8		21q21.3	AMP	1	489	0.002	No
WDR77		1p13.2	AMP	1	489	0.002	No
NBAS		2p24.3	AMP	2	489	0.004	No
NPR2		9p13.3	AMP	5	489	0.01	No
LYPLA1		8q11.23	AMP	24	489	0.049	No
LINC01238		2q37.3	AMP	2	489	0.004	No
LINC00111		21q22.3	AMP	1	489	0.002	No
CRELD1		3p25.3	AMP	1	489	0.002	No
C17ORF102		17q12	AMP	1	489	0.002	No
ZNF800		7q31.33	AMP	2	489	0.004	No
ITGAM		16p11.2	AMP	4	489	0.008	No
TRMT61A		14q32.33	AMP	3	489	0.006	No
CDK6		7q21.2	AMP	8	489	0.016	Yes
EOLA1		Xq28	AMP	5	489	0.01	No
CDC42EP2		11q13.1	AMP	5	489	0.01	No
NPR1		1q21.3	AMP	9	489	0.018	No
SRRT		7q22.1	AMP	8	489	0.016	No
FCN2		9q34.3	AMP	7	489	0.014	No
MRPL57		13q12.11	AMP	2	489	0.004	No
SMIM7		19p13.11	AMP	3	489	0.006	No
PARD6B		20q13.13	AMP	6	489	0.012	No
TENM3-AS1		4q34.3	AMP	2	489	0.004	No
ZBTB45		19q13.43	AMP	1	489	0.002	No
CDK7		5q13.2	AMP	1	489	0.002	No
ITGAL		16p11.2	AMP	4	489	0.008	No
NPPC		2q37.1	AMP	1	489	0.002	No
RBM14		11q13.2	AMP	8	489	0.016	No
TNFRSF12A		16p13.3	AMP	6	489	0.012	No
LRRC38		1p36.21	AMP	1	489	0.002	No
FRG1		4q35.2	AMP	1	489	0.002	No
BHLHE22		8q12.3	AMP	25	489	0.051	No
PRICKLE2-AS1		3p14.1	AMP	3	489	0.006	No
ALG12		22q13.33	AMP	2	489	0.004	No
MFSD2A		1p34.2	AMP	1	489	0.002	No
COLEC11		2p25.3	AMP	4	489	0.008	No
COL4A3		2q36.3	AMP	1	489	0.002	No
CORIN		4p12	AMP	2	489	0.004	No
MRM1		17q12	AMP	1	489	0.002	No
FCRL4		1q23.1	AMP	4	489	0.008	Yes
ZNF426		19p13.2	AMP	1	489	0.002	No
ZBTB37		1q25.1	AMP	2	489	0.004	No
COL4A4		2q36.3	AMP	1	489	0.002	No
CDK5		7q36.1	AMP	5	489	0.01	No
ITGAD		16p11.2	AMP	4	489	0.008	No
ACY3		11q13.2	AMP	10	489	0.02	No
TUBGCP3		13q34	AMP	3	489	0.006	No
TMPO		12q23.1	AMP	9	489	0.018	No
UPP1		7p12.3	AMP	1	489	0.002	No
EIF4A3		17q25.3	AMP	1	489	0.002	No
IDH2		15q26.1	AMP	1	489	0.002	Yes
FCN1		9q34.3	AMP	7	489	0.014	No
MIR100HG		11q24.1	AMP	2	489	0.004	No
TMEFF1		9q31.1	AMP	5	489	0.01	No
SEC24B		4q25	AMP	1	489	0.002	No
CSNK2A3		11p15.4	AMP	1	489	0.002	No
OR8H1		11q12.1	AMP	1	489	0.002	No
SLC35G1		10q23.33	AMP	1	489	0.002	No
TMPRSS2		21q22.3	AMP	1	489	0.002	Yes
TMEM130		7q22.1	AMP	8	489	0.016	No
BCLAF1		6q23.3	AMP	1	489	0.002	No
UPK2		11q23.3	AMP	3	489	0.006	No
IDH1		2q34	AMP	1	489	0.002	Yes
TMEM51-AS1		1p36.21	AMP	2	489	0.004	No
PVALB		22q12.3	AMP	1	489	0.002	No
LRRC46		17q21.32	AMP	3	489	0.006	No
GAGE2D		Xp11.23	AMP	1	489	0.002	No
FTHL18		Xp21.1	AMP	4	489	0.008	No
ACOX3		4p16.1	AMP	2	489	0.004	No
PGRMC2		4q28.2	AMP	2	489	0.004	No
CDK4		12q14.1	AMP	1	489	0.002	Yes
FAM245A		10q23.2	AMP	1	489	0.002	No
TM9SF4		20q11.21	AMP	4	489	0.008	No
IDE		10q23.33	AMP	2	489	0.004	No
TMSB4X		Xp22.2	AMP	3	489	0.006	No
PVR		19q13.31	AMP	1	489	0.002	No
SCRN2		17q21.32	AMP	3	489	0.006	No
FCGRT		19q13.33	AMP	2	489	0.004	No
AXIN2		17q24.1	AMP	3	489	0.006	Yes
ARIH2		3p21.31	AMP	1	489	0.002	No
RMND5B		5q35.3	AMP	5	489	0.01	No
SBF2-AS1		11p15.4	AMP	1	489	0.002	No
ADAMTS1		21q21.3	AMP	3	489	0.006	No
NECTIN1		11q23.3	AMP	2	489	0.004	No
FKTN		9q31.2	AMP	6	489	0.012	No
MYCN		2p24.3	AMP	1	489	0.002	Yes
SCARF1		17p13.3	AMP	1	489	0.002	No
AXIN1		16p13.3	AMP	5	489	0.01	Yes
NECTIN2		19q13.32	AMP	2	489	0.004	No
CDK2		12q13.2	AMP	4	489	0.008	No
FNDC3B		3q26.31	AMP	14	489	0.029	No
OTUB2		14q32.12	AMP	3	489	0.006	No
OR5T2		11q12.1	AMP	1	489	0.002	No
UMODL1		21q22.3	AMP	1	489	0.002	No
PLEKHA3		2q31.2	AMP	2	489	0.004	No
FCGR3B		1q23.3	AMP	4	489	0.008	No
BRAP		12q24.12	AMP	4	489	0.008	No
ZNF776		19q13.43	AMP	1	489	0.002	No
LINC01098		4q34.3	AMP	1	489	0.002	No
CDK3		17q25.1	AMP	3	489	0.006	No
ITGA7		12q13.2	AMP	5	489	0.01	No
PCYOX1L		5q32	AMP	3	489	0.006	No
C6ORF141		6p12.3	AMP	1	489	0.002	No
PMPCB		7q22.1	AMP	6	489	0.012	No
FAM155A		13q33.3	AMP	2	489	0.004	No
KIAA0232		4p16.1	AMP	2	489	0.004	No
HNRNPLL		2p22.1	AMP	1	489	0.002	No
TRAPPC6A		19q13.32	AMP	1	489	0.002	No
MEIG1		10p13	AMP	1	489	0.002	No
LINC01622		6p25.3	AMP	1	489	0.002	No
CDH17		8q22.1	AMP	40	489	0.082	No
ITGA5		12q13.13	AMP	4	489	0.008	No
MYCL		1p34.2	AMP	1	489	0.002	Yes
FCGR2B		1q23.3	AMP	4	489	0.008	Yes
YIPF2		19p13.2	AMP	1	489	0.002	No
CKMT1A		15q15.3	AMP	1	489	0.002	No
STXBP5L		3q13.33	AMP	2	489	0.004	No
METTL22		16p13.2	AMP	6	489	0.012	No
NKAIN2		6q22.31	AMP	2	489	0.004	No
CDC7		1p22.1	AMP	1	489	0.002	No
LRGUK		7q33	AMP	7	489	0.014	No
ZIK1		19q13.43	AMP	2	489	0.004	No
CDH18		5p14.3	AMP	1	489	0.002	No
RSPH1		21q22.3	AMP	2	489	0.004	No
PRR14		16p11.2	AMP	4	489	0.008	No
FCGR3A		1q23.3	AMP	4	489	0.008	No
RNF217		6q22.31	AMP	2	489	0.004	No
ZNF547		19q13.43	AMP	2	489	0.004	No
CARD14		17q25.3	AMP	1	489	0.002	No
OR6C6		12q13.2	AMP	5	489	0.01	No
LINC02370		12q24.33	AMP	2	489	0.004	No
ADAMTS20		12q12	AMP	2	489	0.004	No
DOCK9-DT		13q32.3	AMP	2	489	0.004	No
SHTN1		10q25.3	AMP	1	489	0.002	No
FANCM		14q21.2	AMP	3	489	0.006	No
CFC1B		2q21.1	AMP	1	489	0.002	No
CNPY4		7q22.1	AMP	6	489	0.012	No
SMG1P1		16p12.2	AMP	5	489	0.01	No
UCK2		1q24.1	AMP	3	489	0.006	No
CYP3A7-CYP3A51P		7q22.1	AMP	6	489	0.012	No
RPL36A		Xq22.1	AMP	1	489	0.002	No
LYPD2		8q24.3	AMP	29	489	0.059	No
BANCR		9q21.11-q21.12	AMP	2	489	0.004	No
DACT1		14q23.1	AMP	2	489	0.004	No
FKBP14		7p14.3	AMP	5	489	0.01	No
BRIX1		5p13.2	AMP	3	489	0.006	No
HEXA-AS1		15q23	AMP	1	489	0.002	No
DUSP23		1q23.2	AMP	4	489	0.008	No
LINC01089		12q24.31	AMP	4	489	0.008	No
UMPS		3q21.2	AMP	3	489	0.006	No
NTSR2		2p25.1	AMP	2	489	0.004	No
PAX6-AS1		11p13	AMP	1	489	0.002	No
UGDH-AS1		4p14	AMP	1	489	0.002	No
SLC35A5		3q13.2	AMP	1	489	0.002	No
ADRA2B		2q11.2	AMP	3	489	0.006	No
RNF121		11q13.4	AMP	2	489	0.004	No
PCCA-AS1		13q32.3	AMP	3	489	0.006	No
GAS2L2		17q12	AMP	2	489	0.004	No
ARPIN		15q26.1	AMP	1	489	0.002	No
NOTUM		17q25.3	AMP	2	489	0.004	No
KANSL2		12q13.11	AMP	1	489	0.002	No
C10ORF143		10q26.3	AMP	1	489	0.002	No
COL14A1		8q24.12	AMP	33	489	0.067	No
SMPD4BP		2q21.1	AMP	1	489	0.002	No
SLX1A		16p11.2	AMP	4	489	0.008	No
RPLP0		12q24.23	AMP	6	489	0.012	No
DNM1P41		15q25.2	AMP	1	489	0.002	No
CCDC91		12p11.22	AMP	2	489	0.004	No
STOML2		9p13.3	AMP	4	489	0.008	No
NALCN-AS1		13q32.3	AMP	3	489	0.006	No
ADRA2C		4p16.3	AMP	2	489	0.004	No
RAD1		5p13.2	AMP	3	489	0.006	No
USP47		11p15.3	AMP	1	489	0.002	No
HERC2P2		15q11.2	AMP	5	489	0.01	No
PGPEP1L		15q26.3	AMP	1	489	0.002	No
CASTOR3		7q22.1	AMP	7	489	0.014	No
EME2		16p13.3	AMP	7	489	0.014	No
UNG		12q24.11	AMP	5	489	0.01	No
RAPGEF5		7p15.3	AMP	9	489	0.018	No
RPLP1		15q23	AMP	2	489	0.004	No
IRGM		5q33.1	AMP	2	489	0.004	No
TRMT12		8q24.13	AMP	37	489	0.076	No
ADRB1		10q25.3	AMP	1	489	0.002	No
ZNF317		19p13.2	AMP	1	489	0.002	No
SLC66A1L		3q25.32	AMP	5	489	0.01	No
CASK		Xp11.4	AMP	1	489	0.002	No
NT5C1B-RDH14		2p24.2	AMP	2	489	0.004	No
RASSF2		20p13	AMP	1	489	0.002	No
USP4		3p21.31	AMP	1	489	0.002	No
VWA3A		16p12.2	AMP	5	489	0.01	No
CDCA4		14q32.33	AMP	2	489	0.004	No
CNOT6L		4q21.1	AMP	2	489	0.004	No
ADRB2		5q32	AMP	3	489	0.006	No
COMMD4		15q24.2	AMP	1	489	0.002	No
CCDC14		3q21.1	AMP	2	489	0.004	No
MYH1		17p13.1	AMP	2	489	0.004	No
YY2		Xp22.12	AMP	2	489	0.004	No
CBLC		19q13.32	AMP	2	489	0.004	Yes
ENGASE		17q25.3	AMP	1	489	0.002	No
TMF1		3p14.1	AMP	1	489	0.002	No
PURA		5q31.3	AMP	4	489	0.008	No
NR1H2		19q13.3	AMP	1	489	0.002	No
PTCD3		2p11.2	AMP	3	489	0.006	No
NBPF15		1q21.1	AMP	5	489	0.01	No
CYCSP52		1q23.1	AMP	4	489	0.008	No
USP37		2q35	AMP	3	489	0.006	No
FRG1JP		9q13	AMP	6	489	0.012	No
ADRB3		8p11.23	AMP	15	489	0.031	No
PRKRA		2q31.2	AMP	2	489	0.004	No
SARS2		19q13.2	AMP	3	489	0.006	No
MYF6		12q21.31	AMP	5	489	0.01	No
PCED1A		20p13	AMP	1	489	0.002	No
TMEM94		17q25.1	AMP	3	489	0.006	No
DCBLD1		6q22.1	AMP	2	489	0.004	No
GOLGA8N		15q13.3	AMP	2	489	0.004	No
TMOD1		9q22.33	AMP	5	489	0.01	No
RUSC1		1q22	AMP	8	489	0.016	No
PARTICL		2p11.2	AMP	4	489	0.008	No
GRK3		22q12.1	AMP	1	489	0.002	No
LINC00554		13q32.3	AMP	2	489	0.004	No
ATOH7		10q21.3	AMP	5	489	0.01	No
CCDC40		17q25.3	AMP	1	489	0.002	No
IDH3A		15q25.1	AMP	1	489	0.002	No
DDX55		12q24.31	AMP	2	489	0.004	No
NOL8		9q22.31	AMP	2	489	0.004	No
CCBE1		18q21.32	AMP	1	489	0.002	No
AKR7A2		1p36.13	AMP	1	489	0.002	No
GRK2		11q13.2	AMP	10	489	0.02	No
ZNF716		7p11.2	AMP	2	489	0.004	No
TDRD6		6p12.3	AMP	1	489	0.002	No
MYF5		12q21.31	AMP	5	489	0.01	No
C16ORF90		16p13.3	AMP	4	489	0.008	No
CCNP		19q13.2	AMP	1	489	0.002	No
SPO11		20q13.31	AMP	5	489	0.01	No
TSPEAR-AS1		21q22.3	AMP	1	489	0.002	No
LINC02229		5q12.3	AMP	1	489	0.002	No
EPC2		2q23.1	AMP	1	489	0.002	No
MED15		22q11.21	AMP	1	489	0.002	No
REXO1L2P		8q21.2	AMP	35	489	0.072	No
ACSF3		16q24.3	AMP	1	489	0.002	No
CWF19L1		10q24.31	AMP	3	489	0.006	No
EIF6		20q11.22	AMP	3	489	0.006	No
COL8A1		3q12.1	AMP	3	489	0.006	No
ZDHHC12		9q34.11	AMP	8	489	0.016	No
FAM89B		11q13.1	AMP	5	489	0.01	No
PCF11		11q14.1	AMP	3	489	0.006	No
PRPF31		19q13.42	AMP	4	489	0.008	No
CCDC168		13q33.1	AMP	3	489	0.006	No
ADSS2		1q44	AMP	3	489	0.006	No
NR5A2		1q32.1	AMP	1	489	0.002	No
RHOD		11q13.2	AMP	9	489	0.018	No
GGN		19q13.2	AMP	4	489	0.008	No
C1ORF198		1q42.2	AMP	1	489	0.002	No
ITGB4		17q25.1	AMP	3	489	0.006	No
ST6GAL2		2q12.3	AMP	1	489	0.002	No
WAC		10p12.1	AMP	1	489	0.002	No
CENPI		Xq22.1	AMP	1	489	0.002	No
LIPK		10q23.31	AMP	1	489	0.002	No
CPSF2		14q32.12	AMP	2	489	0.004	No
ZNF778		16q24.3	AMP	1	489	0.002	No
PIAS4		19p13.3	AMP	1	489	0.002	No
LINC02328		14q31.3	AMP	2	489	0.004	No
CNTNAP3		9p12	AMP	6	489	0.012	No
ITGB3		17q21.32	AMP	3	489	0.006	No
USP17L17		4p16.1	AMP	2	489	0.004	No
ZNF503-AS1		10q22.2	AMP	4	489	0.008	No
LINC00189		21q21.3	AMP	1	489	0.002	No
PRND		20p13	AMP	1	489	0.002	No
AMZ2		17q24.2	AMP	2	489	0.004	No
CC2D2B		10q24.1	AMP	1	489	0.002	No
FSHR		2p16.3	AMP	1	489	0.002	No
RPS4X		Xq13.1	AMP	1	489	0.002	No
SPPL2A		15q21.2	AMP	1	489	0.002	No
SLC39A2		14q11.2	AMP	2	489	0.004	No
CHD8		14q11.2	AMP	1	489	0.002	No
COL7A1		3p21.31	AMP	1	489	0.002	No
UROS		10q26.2	AMP	3	489	0.006	No
SLC16A12		10q23.31	AMP	1	489	0.002	No
SPG21		15q22.31	AMP	1	489	0.002	No
LINC02740		11p12	AMP	2	489	0.004	No
SLC35E1		19p13.11	AMP	3	489	0.006	No
C19ORF71		19p13.3	AMP	1	489	0.002	No
TUBB1		20q13.32	AMP	3	489	0.006	No
DUS2		16q22.1	AMP	1	489	0.002	No
TOX3		16q12.1	AMP	3	489	0.006	No
VWA2		10q25.3	AMP	1	489	0.002	No
PYCARD-AS1		16p11.2	AMP	4	489	0.008	No
UBE2W		8q21.11	AMP	38	489	0.078	No
RPUSD4		11q24.2	AMP	1	489	0.002	No
RNU6-81P		13q21.31	AMP	1	489	0.002	No
USF1		1q23.3	AMP	3	489	0.006	No
ANO4		12q23.1	AMP	8	489	0.016	No
LINC00943		12q24.32	AMP	4	489	0.008	No
LINC01979		17q25.3	AMP	1	489	0.002	No
RANBP3-DT		19p13.3	AMP	1	489	0.002	No
FOXL3-OT1		7p22.3	AMP	1	489	0.002	No
RPS5		19q13.43	AMP	1	489	0.002	No
MCOLN3		1p22.3	AMP	1	489	0.002	No
APCDD1L-DT		20q13.32	AMP	3	489	0.006	No
CCDC154		16p13.3	AMP	6	489	0.012	No
TSPEAR		21q22.3	AMP	1	489	0.002	No
USF2		19q13.12	AMP	3	489	0.006	No
SMLR1		6q23.1	AMP	2	489	0.004	No
RPS6		9p22.1	AMP	1	489	0.002	No
ARL17A		17q21.31	AMP	2	489	0.004	No
CENPP		9q22.31	AMP	3	489	0.006	No
USP17L15		4p16.1	AMP	2	489	0.004	No
LRRC36		16q22.1	AMP	1	489	0.002	No
AIFM2		10q22.1	AMP	4	489	0.008	No
LIPN		10q23.31	AMP	1	489	0.002	No
RNU6-83P		13q32.3	AMP	35	489	0.072	No
TCTN3		10q24.1	AMP	1	489	0.002	No
CYGB		17q25.1	AMP	2	489	0.004	No
RPS6KA1		1p36.11	AMP	1	489	0.002	No
COL5A2		2q32.2	AMP	1	489	0.002	No
TMEM140		7q33	AMP	6	489	0.012	No
NRBF2		10q21.3	AMP	5	489	0.01	No
OTX2-AS1		14q22.3	AMP	2	489	0.004	No
GNAS-AS1		20q13.32	AMP	3	489	0.006	No
RTCA-AS1		1p21.2	AMP	2	489	0.004	No
MYL1		2q34	AMP	2	489	0.004	No
LINC01815		2p12	AMP	2	489	0.004	No
FECH		18q21.31	AMP	1	489	0.002	No
INTS4P2		7q11.21	AMP	2	489	0.004	No
BAG5		14q32.33	AMP	3	489	0.006	No
ZNF469		16q24.2	AMP	1	489	0.002	No
IFIT1		10q23.31	AMP	2	489	0.004	No
DLL3		19q13.2	AMP	2	489	0.004	No
CCDC175		14q23.1	AMP	1	489	0.002	No
PTENP1-AS		9p13.3	AMP	3	489	0.006	No
CDR1		Xq27.1	AMP	1	489	0.002	No
ITIH3		3p21.1	AMP	1	489	0.002	No
NRCAM		7q31.1	AMP	4	489	0.008	No
CT66		7q11.22	AMP	2	489	0.004	No
IFIT2		10q23.31	AMP	2	489	0.004	No
CYREN		7q33	AMP	6	489	0.012	No
NTNG2		9q34.13	AMP	5	489	0.01	No
CHAC1		15q15.1	AMP	1	489	0.002	No
ZNF718		4p16.3	AMP	4	489	0.008	No
WNT5B		12p13.33	AMP	1	489	0.002	No
TNRC6A		16p12.1	AMP	5	489	0.01	No
TNRC18		7p22.1	AMP	1	489	0.002	No
GDAP1L1		20q13.12	AMP	3	489	0.006	No
ITIH2		10p14	AMP	2	489	0.004	No
GNB5		15q21.2	AMP	2	489	0.004	No
BBLN		9q34.11	AMP	8	489	0.016	No
FGFR1OP2		12p11.23	AMP	2	489	0.004	No
DOK3		5q35.3	AMP	4	489	0.008	No
DPH6-DT		15q14	AMP	3	489	0.006	No
RHPN1-AS1		8q24.3	AMP	30	489	0.061	No
PTAR1		9q21.12	AMP	2	489	0.004	No
EBP		Xp11.23	AMP	3	489	0.006	No
KIFBP		10q22.1	AMP	5	489	0.01	No
PRR23D2		8p23.1	AMP	3	489	0.006	No
PSMB8-AS1		6p21.32	AMP	1	489	0.002	No
AZIN1		8q22.3	AMP	40	489	0.082	No
UBAC1		9q34.3	AMP	5	489	0.01	No
HPS4		22q12.1	AMP	2	489	0.004	No
LRFN4		11q13.2	AMP	9	489	0.018	No
TRIM48		11q11	AMP	1	489	0.002	No
KIRREL3		11q24.2	AMP	2	489	0.004	No
IFI35		17q21.31	AMP	1	489	0.002	No
SLC7A3		Xq13.1	AMP	1	489	0.002	No
CDKN3		14q22.2	AMP	2	489	0.004	No
ITGB8		7p21.1	AMP	8	489	0.016	No
OGFRP1		22q13.2	AMP	1	489	0.002	No
COL9A3		20q13.33	AMP	4	489	0.008	No
KIAA0319L		1p34.3	AMP	1	489	0.002	No
CDIPT		16p11.2	AMP	4	489	0.008	No
FTH1P3		2p23.3	AMP	2	489	0.004	No
FDXR		17q25.1	AMP	3	489	0.006	No
LMLN		3q29	AMP	6	489	0.012	No
TIMM23B		10q11.23	AMP	1	489	0.002	No
OBP2B		9q34.2	AMP	7	489	0.014	No
SLC2A8		9q33.3	AMP	8	489	0.016	No
C1ORF116		1q32.1	AMP	1	489	0.002	No
ITGB7		12q13.13	AMP	6	489	0.012	No
NRAP		10q25.3	AMP	1	489	0.002	No
SYNPO2L		10q22.2	AMP	3	489	0.006	No
CLDN16		3q28	AMP	5	489	0.01	No
CMYA5		5q14.1	AMP	1	489	0.002	No
FTH1		11q12.3	AMP	1	489	0.002	No
C1ORF131		1q42.2	AMP	2	489	0.004	No
AADACL3		1p36.21	AMP	1	489	0.002	No
CDKN2C		1p32.3	AMP	1	489	0.002	Yes
ITGB6		2q24.2	AMP	1	489	0.002	No
SLC11A2		12q13.12	AMP	4	489	0.008	No
CCDC28A-AS1		6q24.1	AMP	1	489	0.002	No
CD2BP2		16p11.2	AMP	4	489	0.008	No
KRBA1		7q36.1	AMP	5	489	0.01	No
COL9A2		1p34.2	AMP	1	489	0.002	No
HFM1		1p22.2	AMP	2	489	0.004	No
CEP112		17q24.1	AMP	3	489	0.006	No
SOCS4		14q22.3	AMP	2	489	0.004	No
CDKN2D		19p13.2	AMP	1	489	0.002	No
ITGB5		3q21.2	AMP	4	489	0.008	No
GAREM1		18q12.1	AMP	1	489	0.002	No
TNF		6p21.33	AMP	1	489	0.002	No
DLGAP5		14q22.3	AMP	2	489	0.004	No
NSUN5P1		7q11.23	AMP	4	489	0.008	No
EEF1E1		6p24.3	AMP	1	489	0.002	No
MROCKI		6q21	AMP	1	489	0.002	No
PXMP2		12q24.33	AMP	2	489	0.004	No
LINC02492		4q35.2	AMP	2	489	0.004	No
CCDC167		6p21.2	AMP	1	489	0.002	No
FZD6		8q22.3	AMP	38	489	0.078	No
MYH10		17p13.1	AMP	1	489	0.002	No
NPEPPS		17q21.32	AMP	3	489	0.006	No
TNNC2		20q13.12	AMP	3	489	0.006	No
KIAA0586		14q23.1	AMP	2	489	0.004	No
PEX2		8q21.13	AMP	38	489	0.078	No
IFI27		14q32.12	AMP	3	489	0.006	No
LINC02880		6q21	AMP	1	489	0.002	No
KLHDC7A		1p36.13	AMP	1	489	0.002	No
DHRS7C		17p13.1	AMP	1	489	0.002	No
KDM1B		6p22.3	AMP	1	489	0.002	No
FZD4		11q14.2	AMP	2	489	0.004	No
MYH9		22q12.3	AMP	2	489	0.004	Yes
B3GNT2		2p15	AMP	2	489	0.004	No
NSA2		5q13.3	AMP	2	489	0.004	No
CREB3L2		7q33	AMP	6	489	0.012	Yes
TNFAIP1		17q11.2	AMP	2	489	0.004	No
IFI16		1q23.1	AMP	4	489	0.008	No
PXN		12q24.23	AMP	6	489	0.012	No
SPCS2		11q13.4	AMP	2	489	0.004	No
POTEI		2q21.1	AMP	1	489	0.002	No
FZD8		10p11.21	AMP	2	489	0.004	No
MYH8		17p13.1	AMP	2	489	0.004	No
B4GALNT3		12p13.33	AMP	1	489	0.002	No
FGF7P3		9p12	AMP	6	489	0.012	No
OR8U3		11q12.1	AMP	1	489	0.002	No
MTSS1		8q24.13	AMP	37	489	0.076	No
TNFAIP2		14q32.32	AMP	3	489	0.006	No
C17ORF80		17q25.1	AMP	3	489	0.006	No
AGAP7P		10q11.22	AMP	2	489	0.004	No
TMEM161A		19p13.11	AMP	1	489	0.002	No
MYH7		14q11.2	AMP	1	489	0.002	No
GRID1-AS1		10q23.1	AMP	1	489	0.002	No
AKR7L		1p36.13	AMP	1	489	0.002	No
POM121L4P		22q11.2	AMP	1	489	0.002	No
S100PBP		1p35.1	AMP	4	489	0.008	No
CFI		4q25	AMP	1	489	0.002	No
TNFAIP3		6q23.3	AMP	1	489	0.002	Yes
SPON1		11p15.2	AMP	1	489	0.002	No
ZGPAT		20q13.33	AMP	5	489	0.01	No
CREB3L4		1q21.3	AMP	12	489	0.025	No
SERPINB11		18q21.33	AMP	1	489	0.002	No
MYH6		14q11.2	AMP	1	489	0.002	No
PPIL6		6q21	AMP	1	489	0.002	No
TECR		19p13.12	AMP	2	489	0.004	No
OR8J1		11q12.1	AMP	1	489	0.002	No
IDUA		4p16.3	AMP	4	489	0.008	No
PRMT5		14q11.2	AMP	1	489	0.002	No
NPY5R		4q32.2	AMP	3	489	0.006	No
FZD9		7q11.23	AMP	4	489	0.008	No
FER1L6		8q24.13	AMP	37	489	0.076	No
MYH4		17p13.1	AMP	2	489	0.004	No
IPPK		9q22.31	AMP	3	489	0.006	No
GOSR1		17q11.2	AMP	2	489	0.004	No
HSD17B7P2		10p11.1	AMP	3	489	0.006	No
NPY6R		5q31.2	AMP	3	489	0.006	No
ITGB2		21q22.3	AMP	1	489	0.002	No
MYH3		17p13.1	AMP	2	489	0.004	No
SPON2		4p16.3	AMP	4	489	0.008	No
TRIM51HP		11q11	AMP	1	489	0.002	No
AP2A1		19q13.33	AMP	2	489	0.004	No
SERPINB12		18q21.33	AMP	1	489	0.002	No
CD200R1		3q13.2	AMP	1	489	0.002	No
HAPLN4		19p13.11	AMP	1	489	0.002	No
IDS		Xq28	AMP	5	489	0.01	No
NPY2R		4q32.1	AMP	1	489	0.002	No
GFI1B		9q34.13	AMP	6	489	0.012	No
PRORSD1P		2p16.1	AMP	2	489	0.004	No
KRT79		12q13.13	AMP	6	489	0.012	No
MB21D2		3q29	AMP	4	489	0.008	No
ZNF653		19p13.2	AMP	1	489	0.002	No
LINC02872		9q21.33	AMP	1	489	0.002	No
SLC22A20P		11q13.1	AMP	5	489	0.01	No
RPN1		3q21.3	AMP	10	489	0.02	Yes
LINC01449		7p14.1	AMP	3	489	0.006	No
TMEM239		20p13	AMP	1	489	0.002	No
PID1		2q36.3	AMP	1	489	0.002	No
LY6D		8q24.3	AMP	29	489	0.059	No
LINC01226		1p35.2	AMP	4	489	0.008	No
AMN1		12p11.21	AMP	4	489	0.008	No
LINC01186		Xp11.3	AMP	3	489	0.006	No
FAAP20		1p36.33	AMP	2	489	0.004	No
TMEM132D-AS1		12q24.33	AMP	2	489	0.004	No
NMNAT3		3q23	AMP	5	489	0.01	No
LINC00112		21q22.3	AMP	1	489	0.002	No
RPN2		20q11.23	AMP	3	489	0.006	No
LINC00558		13q14.3	AMP	1	489	0.002	No
OR8K3		11q12.1	AMP	1	489	0.002	No
AHSP		16p11.2	AMP	4	489	0.008	No
VAT1L		16q23.1	AMP	1	489	0.002	No
AP1B1		22q12.2	AMP	1	489	0.002	No
PVT1		8q24.21	AMP	37	489	0.076	No
NAT8L		4p16.3	AMP	4	489	0.008	No
CISD2		4q24	AMP	2	489	0.004	No
SNORD126		14q11.2	AMP	2	489	0.004	No
LIME1		20q13.33	AMP	5	489	0.01	No
OR1B1		9q33.2	AMP	6	489	0.012	No
CA14		1q21.2	AMP	8	489	0.016	No
UQCRC1		3p21.31	AMP	1	489	0.002	No
LINC00113		21q21.3	AMP	2	489	0.004	No
RNF144A		2p25.1	AMP	4	489	0.008	No
GPAT2		2q11.2	AMP	3	489	0.006	No
METTL24		6q21	AMP	1	489	0.002	No
ZSWIM6		5q12.1	AMP	2	489	0.004	No
RASIP1		19q13.33	AMP	2	489	0.004	No
C4ORF19		4p14	AMP	1	489	0.002	No
AP2B1		17q12	AMP	2	489	0.004	No
PIEZO1		16q24.3	AMP	1	489	0.002	No
OR1J1		9q33.2	AMP	6	489	0.012	No
UQCRC2		16p12.2	AMP	5	489	0.01	No
CEP57L1		6q21	AMP	1	489	0.002	No
RPS2		16p13.3	AMP	6	489	0.012	No
PWP2		21q22.3	AMP	1	489	0.002	No
LRRC4C		11p12	AMP	2	489	0.004	No
PLUT		13q12.2	AMP	3	489	0.006	No
ARL6IP4		12q24.31	AMP	4	489	0.008	No
COMMD6		13q22.2	AMP	3	489	0.006	No
CHTF8		16q22.1	AMP	2	489	0.004	No
SNORD12B		19p13.2	AMP	5	489	0.01	No
TFAMP1		7p22.3	AMP	2	489	0.004	No
PILRB		7q22.1	AMP	8	489	0.016	No
ARPIN-AP3S2		15q26.1	AMP	1	489	0.002	No
RPS3		11q13.4	AMP	2	489	0.004	No
UQCRFS1		19q12	AMP	1	489	0.002	No
GAPVD1		9q33.3	AMP	7	489	0.014	No
HEATR3		16q12.1	AMP	4	489	0.008	No
AEBP1		7p13	AMP	1	489	0.002	No
BPNT2		8q12.1	AMP	24	489	0.049	No
PTCSC3		14q13.3	AMP	6	489	0.012	No
RPS3A		4q31.3	AMP	3	489	0.006	No
MATR3		5q31.2	AMP	5	489	0.01	No
KPNA6		1p35.2	AMP	4	489	0.008	No
PEX19		1q23.2	AMP	4	489	0.008	No
TMEM255A		Xq24	AMP	1	489	0.002	No
TLE5		19p13.3	AMP	1	489	0.002	No
CHCHD3		7q32.3-q33	AMP	6	489	0.012	No
NUP62		19q13.33	AMP	1	489	0.002	No
CLDN5		22q11.21	AMP	1	489	0.002	No
LINC02106		5q11.1	AMP	1	489	0.002	No
UQCRH		1p33	AMP	1	489	0.002	No
BANK1		4q24	AMP	2	489	0.004	No
FZD1		7q21.13	AMP	7	489	0.014	No
CRISP1		6p12.3	AMP	1	489	0.002	No
OR7E2P		11q14.2	AMP	2	489	0.004	No
RICTOR		5p13.1	AMP	2	489	0.004	Yes
CDC26		9q32	AMP	5	489	0.01	No
UBE2R2		9p13.3	AMP	3	489	0.006	No
LOC101927572		19q13.12	AMP	2	489	0.004	No
SSBP2		5q14.1	AMP	1	489	0.002	No
PARP12		7q34	AMP	6	489	0.012	No
SNX17		2p23.3	AMP	2	489	0.004	No
C3ORF22		3q21.3	AMP	5	489	0.01	No
CLEC3B		3p21.31	AMP	1	489	0.002	No
FAM47C		Xp21.1	AMP	4	489	0.008	No
LINC00563		13q14.13	AMP	1	489	0.002	No
UROD		1p34.1	AMP	1	489	0.002	No
ABCD4		14q24.3	AMP	2	489	0.004	No
PHIP		6q14.1	AMP	1	489	0.002	No
ZBTB26		9q33.2	AMP	7	489	0.014	No
EOMES		3p24.1	AMP	1	489	0.002	No
LINC00565		13q34	AMP	2	489	0.004	No
ZSCAN32		16p13.3	AMP	5	489	0.01	No
MYH11		16p13.11	AMP	6	489	0.012	Yes
LARP7		4q25	AMP	1	489	0.002	No
DHDDS		1p36.11	AMP	1	489	0.002	No
USH1G		17q25.1	AMP	3	489	0.006	No
COLEC12		18p11.32	AMP	1	489	0.002	No
R3HDML		20q13.12	AMP	3	489	0.006	No
ARID3C		9p13.3	AMP	3	489	0.006	Yes
WDR38		9q33.3	AMP	7	489	0.014	No
MIPEPP3		13q12.11	AMP	2	489	0.004	No
CALN1		7q11.22	AMP	2	489	0.004	No
HEPACAM2		7q21.2	AMP	6	489	0.012	No
CDSN		6p21.33	AMP	2	489	0.004	No
SLITRK2		Xq27.3	AMP	1	489	0.002	No
NLRC3		16p13.3	AMP	5	489	0.01	No
GDE1		16p12.3	AMP	5	489	0.01	No
GLDN		15q21.2	AMP	1	489	0.002	No
SIGLEC10		19q13.41	AMP	2	489	0.004	No
RPP25L		9p13.3	AMP	3	489	0.006	No
SLC4A9		5q31.3	AMP	3	489	0.006	No
PLPPR3		19p13.3	AMP	1	489	0.002	No
PLXDC2		10p12.31	AMP	2	489	0.004	No
KDM4E		11q21	AMP	2	489	0.004	No
ZNF582-DT		19q13.43	AMP	2	489	0.004	No
PYGO2		1q21.3	AMP	11	489	0.022	No
RASGRP4		19q13.2	AMP	4	489	0.008	No
AFAP1L2		10q25.3	AMP	1	489	0.002	No
TRHDE-AS1		12q21.1	AMP	3	489	0.006	No
KCNH6		17q23.3	AMP	2	489	0.004	No
TMEM14EP		3q25.2	AMP	6	489	0.012	No
LINC00706		10p14	AMP	3	489	0.006	No
SLC22A17		14q11.2	AMP	1	489	0.002	No
CATIP-AS1		2q35	AMP	3	489	0.006	No
TRAPPC9		8q24.3	AMP	32	489	0.065	No
PLEKHS1		10q25.3	AMP	1	489	0.002	No
TMTC4		13q32.3	AMP	3	489	0.006	No
GAPT		5q11.2	AMP	1	489	0.002	No
SLC6A10P		16p11.2	AMP	9	489	0.018	No
LINC00659		20q13.33	AMP	4	489	0.008	No
SLC25A32		8q22.3	AMP	39	489	0.08	No
ESF1		20p12.1	AMP	4	489	0.008	No
LINC02080		17q25.1-q25.2	AMP	2	489	0.004	No
RHNO1		12p13.33	AMP	2	489	0.004	No
KISS1R		19p13.3	AMP	1	489	0.002	No
SERTAD1		19q13.2	AMP	1	489	0.002	No
LRRC14B		5p15.33	AMP	2	489	0.004	No
IZUMO1R		11q21	AMP	2	489	0.004	No
RPS6KA2-AS1		6q27	AMP	1	489	0.002	No
CDS1		4q21.23	AMP	1	489	0.002	No
UPK1A-AS1		19q13.12	AMP	3	489	0.006	No
CHASERR		15q26.1	AMP	1	489	0.002	No
IMP3		15q24.2	AMP	1	489	0.002	No
FBH1		10p15.1	AMP	3	489	0.006	No
GAGE12E		Xp11.23	AMP	1	489	0.002	No
NEAT1		11q13.1	AMP	5	489	0.01	No
FAM162A		3q21.1	AMP	2	489	0.004	No
TLR8		Xp22.2	AMP	3	489	0.006	No
TECRL		4q13.1	AMP	3	489	0.006	No
LINC01741		1q25.2	AMP	1	489	0.002	No
SELENOH		11q12.1	AMP	1	489	0.002	No
RNF157-AS1		17q25.1	AMP	3	489	0.006	No
CHCHD1		10q22.2	AMP	3	489	0.006	No
PPIE		1p34.2	AMP	1	489	0.002	No
LINC01797		2p14	AMP	2	489	0.004	No
LINGO1		15q24.3	AMP	1	489	0.002	No
SLC25A45		11q13.1	AMP	5	489	0.01	No
LINC00158		21q21.2	AMP	3	489	0.006	No
NME8		7p14.1	AMP	3	489	0.006	No
MUC15		11p14.2	AMP	1	489	0.002	No
XAGE5		Xp11.22	AMP	1	489	0.002	No
NAMA		9q22.33	AMP	4	489	0.008	No
RSPH4A		6q22.1	AMP	2	489	0.004	No
FAM41C		1p36.33	AMP	2	489	0.004	No
CLPTM1L		5p15.33	AMP	2	489	0.004	No
APOOP5		16q21	AMP	1	489	0.002	No
CIB3		19p13.11	AMP	3	489	0.006	No
TMTC2		12q21.31	AMP	4	489	0.008	No
TEX49		12q13.12	AMP	1	489	0.002	No
ETDB		Xq26.3	AMP	1	489	0.002	No
MIGA2		9q34.11	AMP	7	489	0.014	No
RNU6-66P		13q22.1	AMP	2	489	0.004	No
SH3BGRL2		6q14.1	AMP	1	489	0.002	No
GASK1B		4q32.1	AMP	1	489	0.002	No
HSPB8		12q24.23	AMP	7	489	0.014	No
STK35		20p13	AMP	1	489	0.002	No
XAGE3		Xp11.22	AMP	1	489	0.002	No
FBLL1		5q34	AMP	6	489	0.012	No
ANTXRLP1		10q11.22	AMP	2	489	0.004	No
ATAD1		10q23.31	AMP	1	489	0.002	No
MYO5A		15q21.2	AMP	1	489	0.002	Yes
CERS2		1q21.3	AMP	8	489	0.016	No
TCF7L1		2p11.2	AMP	6	489	0.012	No
MYO1E		15q22.2	AMP	2	489	0.004	No
ECI2		6p25.2	AMP	1	489	0.002	No
TNS3		7p12.3	AMP	2	489	0.004	No
CD300LB		17q25.1	AMP	3	489	0.006	No
SLC25A24		1p13.3	AMP	1	489	0.002	No
APELA		4q32.3	AMP	2	489	0.004	No
YIF1B		19q13.2	AMP	3	489	0.006	No
FGF3		11q13.3	AMP	8	489	0.016	Yes
CEP41		7q32.2	AMP	4	489	0.008	No
RNU6-67P		13q31.1	AMP	2	489	0.004	No
GGTLC1		20p11.21	AMP	1	489	0.002	No
HCG27		6p21.33	AMP	2	489	0.004	No
FGD1		Xp11.22	AMP	1	489	0.002	No
NAV3		12q21.2	AMP	5	489	0.01	No
NAV1		1q32.1	AMP	1	489	0.002	No
[truncated: 16,336 more rows]
